# Supplementary material for: Protocol for an integrated evaluation framework to study training, curricular and contextual factors impacting the success of a measurement for improvement training programme for healthcare staff in Ireland
Source: PubMed Central journal article supplement — BMJ Open. 2022 Feb 11;12(2):e047639. doi: 10.1136/bmjopen-2020-047639 (PMC8845174; doi:10.1136/bmjopen-2020-047639), 2022-02-11
Supplement: bmjopen-2020-047639.draft_revisions.pdf [file bmjopen-2020-047639.draft_revisions.pdf]

# BMJ Open

BMJ Open is committed to open peer review. As part of this commitment we make the peer review history of every article we publish publicly available.

When an article is published we post the peer reviewers' comments and the authors' responses online. We also post the versions of the paper that were used during peer review. These are the versions that the peer review comments apply to.

The versions of the paper that follow are the versions that were submitted during the peer review process. They are not the versions of record or the final published versions. They should not be cited or distributed as the published version of this manuscript.

BMJ Open is an open access journal and the full, final, typeset and author-corrected version of record of the manuscript is available on our site with no access controls, subscription charges or pay-per-view fees (<http://bmjopen.bmj.com>).

If you have any questions on BMJ Open's open peer review process please email [info.bmjopen@bmj.com](mailto:info.bmjopen@bmj.com)

# BMJ Open

**Case-study protocol for an integrated evaluation approach to study training, curricular and contextual factors impacting the success of a Measurement for Improvement training programme.**

|                               |                                                                                                                                                                                                                                                                                           |
|-------------------------------|-------------------------------------------------------------------------------------------------------------------------------------------------------------------------------------------------------------------------------------------------------------------------------------------|
| Journal:                      | <i>BMJ Open</i>                                                                                                                                                                                                                                                                           |
| Manuscript ID                 | bmjopen-2020-047639                                                                                                                                                                                                                                                                       |
| Article Type:                 | Protocol                                                                                                                                                                                                                                                                                  |
| Date Submitted by the Author: | 05-Dec-2020                                                                                                                                                                                                                                                                               |
| Complete List of Authors:     | Khurshid, Zuneera; University College Dublin, School of Nursing Midwifery and Health Systems<br>De Brún, Aoife; University College Dublin, School of Nursing, Midwifery & Health Systems<br>McAuliffe, Eilish; University College Dublin, School of Nursing, Midwifery and Health Systems |
| Keywords:                     | Quality in health care < HEALTH SERVICES ADMINISTRATION & MANAGEMENT, EDUCATION & TRAINING (see Medical Education & Training), QUALITATIVE RESEARCH                                                                                                                                       |
|                               |                                                                                                                                                                                                                                                                                           |

SCHOLARONE™  
Manuscripts

1  
2  
3 1 **TITLE**  
4  
5

6 2 Case-study protocol for an integrated evaluation approach to study training,  
7  
8 3 curricular and contextual factors impacting the success of a Measurement for  
9  
10 4 Improvement training programme.  
11  
12

13  
14 5 **AUTHORS**  
15

16  
17 6 **CORRESPONDING AUTHOR**  
18

19  
20 7 **Full name:** Zuneera Khurshid  
21

22  
23 8 **Institutional Address:** Room B111, UCD Centre for Interdisciplinary Research,  
24  
25 9 Education, and Innovation in Health Systems (UCD IRIS) at the School of Nursing,  
26  
27 10 Midwifery and Health Systems, University College Dublin, Dublin, Ireland.  
28

29  
30 11 **e-mail:** zuneera.khurshid@ucdconnect.ie  
31

32  
33 12 **Telephone:** +353 85 8666598  
34

35  
36 13 **Fax number:** NA  
37

38  
39 14 **City:** Dublin  
40

41  
42 15 **Country:** Ireland  
43

44  
45 16 **Postal Address:** Room B111, UCD Centre for Interdisciplinary Research,  
46  
47 17 Education, and Innovation in Health Systems (UCD IRIS) at the School of Nursing,  
48  
49 18 Midwifery and Health Systems, University College Dublin, Dublin, Ireland.  
50

51  
52 19 **CO-AUTHOR-1**  
53

54  
55 20 **Full name:** Dr Aoife De Brún  
56  
57  
58  
59  
60

1 **Institutional Address:** UCD Centre for Interdisciplinary Research, Education, and  
2 Innovation in Health Systems (UCD IRIS) at the School of Nursing, Midwifery and  
3 Health Systems, University College Dublin, Dublin, Ireland

4 **City:** Dublin

5 **Country:** Ireland

6 **email:** aoife.debrun@ucd.ie

7 **CO-AUTHOR-2**

8 **Full name:** Professor Eilish McAuliffe

9 **Institutional Address:** UCD Centre for Interdisciplinary Research, Education, and  
10 Innovation in Health Systems (UCD IRIS) at the School of Nursing, Midwifery and  
11 Health Systems, University College Dublin, Dublin, Ireland.

12 **City:** Dublin

13 **Country:** Ireland

14 **email:** eilish.mcauliffe@ucd.ie

15 **KEYWORDS**

16 Quality improvement, programme evaluation, measurement for improvement,  
17 qualitative research

18 **WORD COUNT**

19 3369 (excluding title page, references, figures and tables)

20

21



## 1 **Ethics and dissemination**

2 The study has received exemption from full ethical review from the Human research  
3 ethics committee of our institution (LS-E-19-108). The results of the study will be  
4 disseminated in peer reviewed Journals.

## 5 **STRENGTHS AND LIMITATIONS OF THIS STUDY**

- 6 • Study rigour will be ensured by using triangulation through multiple sources of  
7 data, including perspectives of multiple stakeholders, multiple data collection  
8 methods and double coding.
- 9 • The researchers aim to perform member checking with a broader audience  
10 through an interactive webinar.
- 11 • The study design is responsive to the current situation and explores the role  
12 of QI education and measurement for improvement in adapting to new ways  
13 of working during COVID-19.
- 14 • This study will deepen the understanding of contextual factors that impact QI  
15 and measurement programme success at various levels of the healthcare  
16 system.
- 17 • The major limitation is recall bias as the training programmes being evaluated  
18 were completed more than 2 years ago.

## 19 **INTRODUCTION**

20 Quality in healthcare is a subjective, complex and multi-dimensional concept which  
21 makes it difficult to define and measure (1). The common defining attributes of  
22 healthcare quality in research include the delivery of effective and safe care to attain  
23 desired outcomes and a culture of excellence (2). With the growing importance of  
24 Quality Improvement (QI) knowledge in healthcare, there is a developing research

1  
2  
3 1 interest in the QI curricula content, the effectiveness of educational design and its  
4  
5 2 link with organisational performance (3). However, most QI programme evaluations  
6  
7 3 focus on the improvement of knowledge, skills and confidence of learners and do not  
8  
9 4 offer insights into clinical and long-term effects (4).

10  
11  
12  
13 5 Existing models of training programme evaluation have a narrow focus; they are  
14  
15 6 effective in measuring the outputs but do not provide insights into the process that  
16  
17 7 leads to training effectiveness (5). The impact of contextual factors such as  
18  
19 8 environment, management support and leadership, organizational culture and data  
20  
21 9 infrastructure also remains largely unexplored (6). There is also ambiguity around  
22  
23 10 the quality and effectiveness of the programmes and how the concepts and methods  
24  
25 11 are taught (7).

26  
27  
28  
29  
30 12 One crucial aspect of improvement work is measurement. Measurement is an  
31  
32 13 important element in quality improvement efforts as change needs to be measured to  
33  
34 14 demonstrate improvement and to identify and respond to variation (8). Learning how  
35  
36 15 to measure quality is an important skill for healthcare staff in general and those  
37  
38 16 involved in quality improvement in particular.

39  
40  
41  
42 17 A systematic literature review has revealed that there are no programme evaluation  
43  
44 18 studies focusing on measurement for improvement programmes (Khurshid, Z. A  
45  
46 19 systematic review and narrative synthesis: Determinants of the effectiveness and  
47  
48 20 sustainability of measurement focused Quality Improvement trainings). There is a  
49  
50 21 need to evaluate the effectiveness, sustainability and spread of measurement for  
51  
52 22 improvement programmes but there is uncertainty around evaluation outcomes and  
53  
54 23 methods. The overall purpose of this research is to explore training, curricular and  
55  
56 24 contextual factors that inhibit or enable the success of a measurement for  
57  
58  
59  
60

1  
2  
3 1 improvement training by evaluating experiences of trainees, trainers, programme,  
4  
5 2 and site coordinators. This paper presents an integrated evaluation framework  
6  
7 3 developed to address this research aim. The research is expected to be completed  
8  
9 4 by September 30, 2021.

## 13 **METHODS**

### 16 **Theoretical underpinning**

17  
18  
19 7 The underlying assumption of the research is that to make sense of the problem, the  
20  
21 8 views of stakeholders about the training programme and the context need to be  
22  
23 9 assimilated, which aligns with the constructivist worldview. The constructivist  
24  
25 10 worldview asserts that humans construct meaning when they interact with the world  
26  
27 11 and are influenced by historical and social perspectives and context (9). Another  
28  
29 12 objective of the research is to investigate what works in a certain situation and why  
30  
31 13 and then use this knowledge to develop solutions, linking the research outcomes to  
32  
33 14 recommended actions which is a characteristic of the pragmatist worldview. The  
34  
35 15 pragmatist worldview believes in the presence of multiple forms of reality and that  
36  
37 16 theories are extracted from actions and then applied back in practice through an  
38  
39 17 iterative process (10). The research thus contains elements from pragmatist and  
40  
41 18 constructivist viewpoints which inform the study design.

42  
43  
44  
45  
46  
47 19 This research does not initiate with a well-formed hypothesis but uses an inductive  
48  
49 20 approach to explore the research problem and identify themes and patterns that will  
50  
51 21 deepen the understanding of measurement for improvement programme  
52  
53 22 effectiveness, sustainability spread and evaluation methods (11). Out of the various  
54  
55 23 approaches to do case study research, a pragmatic constructivist approach which  
56  
57 24 asserts that reality is constructed socially and experientially and propagates the use  
58  
59  
60



1  
2  
3 1 of methods which focus on inductive reasoning and interpretation rather than testing  
4  
5 2 hypotheses, aligns closely with the objectives of this research (12).  
6  
7

8 3 This research explores complex contextual and human factors in a real-world  
9  
10 4 healthcare setting making it suitable for a qualitative inquiry (13). It is a retrospective  
11  
12 5 longitudinal study and includes data from different points in time from the same  
13  
14 6 sample that was part of the training. This research question requires a research  
15  
16 7 design that can capture the complexity of the healthcare system, the factors that  
17  
18 8 impact programme development, implementation and evaluation and provide  
19  
20 9 evidence for policy action.  
21  
22  
23

24  
25 10 A case study design can capture the complexity of individual behaviour in  
26  
27 11 institutional settings, factors that influence it, interrelationship of actions and  
28  
29 12 consequences, perceptions about programme goals from the perspective of those  
30  
31 13 who designed it and those who implemented it to provide an evidence base for  
32  
33 14 decision-making and explain success or failure (14). Thus, a case study design will  
34  
35 15 be adopted to capture the information required to adequately address this research  
36  
37 16 question.  
38  
39  
40

41  
42 17 Case-study methodology is a bridge between research paradigms and offers  
43  
44 18 flexibility in epistemology, ontology and methodology by providing a well-defined  
45  
46 19 boundary and structure within which appropriate methods can be applied to answer  
47  
48 20 this complex research question (15). The aim of the study is to gain an in-depth and  
49  
50 21 multifaceted understanding of the effectiveness, sustainability and spread of the  
51  
52 22 measurement for improvement programme in the real-world context (16) which  
53  
54 23 makes case study research a suitable choice. Figure 1 summarises the research  
55  
56 24 design choices through an adaptation of Saunders' research onion (11).  
57  
58  
59  
60

## 1 **Framework Development Process**

2 Programme evaluation should not be considered just a set of techniques but utilized  
3 as an integrated approach in the broader context which is intricately linked with  
4 needs assessment, course design, course presentation, and transfer of training (17).  
5 Programme evaluation can inform policy decisions however it often gets neglected,  
6 with attention being narrowly focused on programme development and  
7 implementation (18). This protocol presents an evaluation framework which  
8 integrates these elements.

9 Research suggests that instead of focusing on the development of a standardised  
10 appraisal tool for objective quality measurement, evaluation should be guided by the  
11 underlying purpose (19). This research aims to retrospectively understand which  
12 curricular, training, and contextual factors inhibit or enable the effectiveness,  
13 sustainability and spread of the measurement for improvement training using a  
14 customised framework. Medical educators can select from various individual  
15 programme evaluation models or use a combination to develop a framework  
16 appropriate to answer their evaluation questions (20). This research draws on two  
17 evaluation models to develop a tool suitable for this case study: The Kirkpatrick  
18 Evaluation Model (21) and Model for Understanding Success in Quality (MUSIQ)  
19 (22).

## 20 **Kirkpatrick Evaluation Model**

21 Kirkpatrick's model measures the impact of training at four levels; reaction of  
22 participants, participant learning, change in behaviour and impact on the  
23 organizational results as a result of the training (21). The model employs  
24 straightforward evaluation criteria and requires measurement of a limited number of

1  
2  
3 1 variables (23). The popularity of this model is attributed to its simplicity in outlining a  
4  
5 2 system for training outcome assessment and simplifying the complex evaluation  
6  
7 3 process; however, it is also criticised for being incomplete (24). The understanding  
8  
9 4 about factors which impact training effectiveness has grown over the years revealing  
10  
11 5 that contextual factors, individual characteristics, and training design elements play a  
12  
13 6 critical role in training success. However, the Kirkpatrick model does not account for  
14  
15 7 these factors (24).

16  
17  
18  
19  
20 8 The model's underlying assumptions are also a source of criticism as it assumes that  
21  
22 9 each succeeding level provides more information than the previous one, each level  
23  
24 10 is causally linked to the other and the correlation between the levels is positive (25).  
25  
26  
27 11 It is independent of the learner's previous experience or learning, individual factors  
28  
29 12 and other environmental and contextual factors that can impact training success  
30  
31 13 (23).

32  
33  
34 14 The Kirkpatrick Model is outcome focused and a drawback of such models is that  
35  
36 15 although they provide a good understanding of what was achieved, they offer little  
37  
38 16 evidence about the process through which these outputs were achieved and the  
39  
40 17 related barriers and enablers. This emphasises the need to go beyond the  
41  
42 18 outcomes-focused Kirkpatrick model to understand how the programme works (26).

43  
44  
45  
46 19 Despite the criticism, the Kirkpatrick model has remained a popular choice for  
47  
48 20 evaluating learner outcomes in training programmes (20) and has been used to  
49  
50 21 evaluate higher education programmes, methodology workshops, professional  
51  
52 22 development programmes and short duration courses (27). This research will rely on  
53  
54 23 the four levels presented by the model but will adapt it to the research question and  
55  
56  
57  
58  
59  
60

1 account for these criticisms through integrating the Model for Understanding  
2 Success in Quality alongside the Kirkpatrick Model in a unified evaluation framework.

### 3 **Model for Understanding Success in Quality (MUSIQ Model)**

4 Context can be defined as the “why” and “when” of change and includes influential  
5 factors from the outer setting and internal setting (28). Factors internal to the  
6 organizational can include organizational size, teams, leadership, culture and  
7 implementation environment while external factors can include regulatory  
8 requirements, funding and professional organizations (29).

9 The systematic literature review conducted in the exploratory phase of the research  
10 highlighted that success of developing data skills of healthcare professional for  
11 quality improvement is not solely dependent on intervention design but also  
12 influenced by context (Khurshid, Z. A systematic review and narrative synthesis:  
13 Determinants of the effectiveness and sustainability of measurement focused Quality  
14 Improvement trainings). Thus, success of a quality improvement intervention can  
15 vary across implementation settings (30). Most studies evaluating quality  
16 improvement programmes focus on the evaluation of the intervention and only few  
17 incorporate methods to assess impact of contextual factors (31). The constructivist-  
18 pragmatist research problem being investigated cannot be fully addressed without  
19 incorporating context into the evaluation design.

20 There is an increased interest in understanding the role of context in quality  
21 improvement initiatives and a number of frameworks and models have been  
22 developed to address this (32). One such model is the Model for Understanding  
23 Success in Quality (MUSIQ). The model acknowledges the system as a product of  
24 individual parts and interrelationships. It identifies twenty-five contextual factors and

1  
2  
3 1 their relative influence at various levels of the healthcare system (22). The model  
4  
5 2 was later revised to expand the number of contextual factors to thirty-six (3). These  
6  
7 3 new factors include external knowledge (general and project specific), portfolio  
8  
9 4 management, specialist staff, microsystem capacity and patient engagement. The  
10  
11 5 factors presented in this model are relevant to the research question and will be  
12  
13 6 incorporated into the evaluation.  
14  
15

16  
17 7 The MUSIQ model is relatively new as it was published in 2012 and has been only  
18  
19 8 used by a handful of studies to date. Therefore, there is insufficient evidence to draw  
20  
21 9 conclusions regarding model usefulness, though studies have confirmed the  
22  
23 10 observation of all original factors in the QI initiatives being studied (33). One reported  
24  
25 11 the framework and underlying assumptions useful for interrogating the research  
26  
27 12 question (34) and another reported that the model was useful in identifying  
28  
29 13 contextual constraints (35).  
30  
31  
32

33  
34 14 The Kirkpatrick model focuses on different outcome levels while MUSIQ adds  
35  
36 15 another perspective of context at healthcare system level. The MUSIQ model offers  
37  
38 16 the missing link to context and relationships in the Kirkpatrick model. The evaluation  
39  
40 17 framework for this research focuses on integrating the two models to address the  
41  
42 18 research question.  
43  
44  
45

### 46 19 **Integrated evaluation framework**

47  
48  
49 20 Knowing what information to collect, whom to collect it from and when to collect are  
50  
51 21 critical decisions in designing a comprehensive evaluation once the purpose of the  
52  
53 22 evaluation has been established (36). The proposed framework presented in Table 1  
54  
55 23 combines evaluation perspectives from the two models and will be used to guide  
56  
57 24 data collection through semi-structured qualitative interviews and document analysis.  
58  
59  
60

- 1 A draft interview guide for collaborative trainees based on the evaluation framework  
 2 is attached in supplemental file 1.

3 **TABLE 1**

- 4 **Title:** Integrated evaluation framework

| <b>Model Components</b>     |                               | <b>Definitions</b>                                                                                         |
|-----------------------------|-------------------------------|------------------------------------------------------------------------------------------------------------|
| <b>External Environment</b> | External motivators           | External factors that stimulate the organization to focus on the QI project                                |
|                             | Project sponsorship           | External entities contributing personnel, expertise, equipment, facilities, or other resources for project |
| <b>Organization</b>         | QI leadership                 | Senior leadership commitment to champion and support QI project                                            |
|                             | Senior leader project sponsor |                                                                                                            |
|                             | Culture supportive of QI      | Values, beliefs, and norms of an organization that shape the behaviours of staff in pursuing QI            |
|                             | Maturity of organizational QI | Sophistication of the organization's QI programmes                                                         |
|                             | Staff engagement              | Steps taken by the organization for continued staff engagement in QI                                       |

|                                |                       |                                                                                                                       |
|--------------------------------|-----------------------|-----------------------------------------------------------------------------------------------------------------------|
| <b>QI support and capacity</b> | Data infrastructure   | Extent to which a system exists to collect, manage, and facilitate the use of data<br><br>Effective use of technology |
|                                | Resource availability | Support for QI, including allocation of resources, finances and staff time                                            |
|                                | Workforce focus on QI | Workforce development through training and engagement in QI                                                           |
| <b>QI team and Microsystem</b> | Team diversity        | Diversity of team members with respect to professional discipline, personality, motivation, and perspective           |
|                                | Physician involvement | Contribution of physicians to the QI team efforts                                                                     |
|                                | Subject matter expert | Team member/members knowledgeable about measurement                                                                   |
|                                | Prior QI experience   | Prior experience with QI                                                                                              |
|                                | Team leadership       | Team leader's ability to accomplish the goals of the improvement project by guiding the QI team                       |
|                                | Team norms            | Team establishes strong norms of behaviour about QI goal achievement                                                  |

|                                              |                                                       |                                                                                                                            |
|----------------------------------------------|-------------------------------------------------------|----------------------------------------------------------------------------------------------------------------------------|
|                                              | Team QI skill/capability for improvement              | Team's ability to use improvement methods to make changes                                                                  |
|                                              | Motivation to change                                  | Extent to which team members have a desire and willingness to improve                                                      |
|                                              | QI Accountability                                     | Clearly stated and communicated responsibility and accountability in the project                                           |
| <b>Trigger (Training Event)</b>              | Participation and Reaction (Kirkpatrick Level 1)      | Overall satisfaction with the programme, content, delivery, logistics, facilitators etc                                    |
|                                              | Knowledge, Skills and Attitudes (Kirkpatrick Level 2) | Improvement in knowledge and skills reported by participants immediately after the intervention                            |
| <b>Outcomes/process &amp; system changes</b> | Behaviour Change (Kirkpatrick Level 3)                | Confidence in measurement skills<br>Maintaining and advancing the skills learned<br>Continued Spread and involvement in QI |
|                                              | Learning Networks                                     | Development of QI networks among post-intervention                                                                         |
|                                              | QI Capacity development                               | Ability of participants to initiate and lead other projects<br>Ability of participants to train/help other staff           |



|  |                                                                                             |                                                                                                                            |
|--|---------------------------------------------------------------------------------------------|----------------------------------------------------------------------------------------------------------------------------|
|  | Change in<br>Organizational<br>Practice and/or<br>Patient Outcomes<br>(Kirkpatrick Level 4) | Sustainability in outcomes achieved<br>Sustainability in practices<br>Process changes as a result of the<br>training event |
|  | Dissemination/spread                                                                        | Spread of knowledge and improved<br>practices to non-intervention units                                                    |
|  | Unintended<br>consequences                                                                  | Negative or positive, unanticipated<br>outcomes                                                                            |

1

## 2 Case Design

3 This research study will adopt a multiple case design (16). Multiple case design is  
4 suitable for this study because measurement for improvement training occurs at a  
5 common venue where it is attended by healthcare staff from diverse backgrounds  
6 and multiple organisations. Participants then return to their own organisations to  
7 apply their learning.

8 In Ireland, the National Quality Improvement Team within the Health Service  
9 Executive (HSE) is responsible for partnering with health and social care services to  
10 promote sustainable quality improvement. The Measurement for Improvement (MFI)  
11 curriculum (37) is one such effort to train staff in handling quantitative and qualitative  
12 data for quality improvement. The curriculum identifies and outlines essential  
13 components of high-quality Measurement for Improvement (MFI) training to ensure a  
14 consistent standard of training for the Irish Healthcare staff (37). The purpose of this

1 research is to apply the integrated framework to evaluate the measurement for  
2 improvement curriculum.

### 3 **Case selection**

4 The bounded systems are the training collaboratives in which the training was  
5 imparted. The trainees belonged to different organizations who came together for the  
6 training and then implemented the skills in their own organizational contexts. The  
7 research design therefore consists of two cases; the Pressure Ulcers to Zero  
8 collaborative (PUTZ) and Clinical Microsystems collaborative, which delivered  
9 measurement for improvement training. Phase 3 of the PUTZ collaborative took  
10 place between November 2016 and February 2018. The aim of the collaborative was  
11 to reduce ward acquired pressure ulcers by 50% in participating teams within six  
12 months and sustain the achieved results at twelve months. The micro-systems  
13 collaborative occurred in 2017 and its aim was to improve the quality of patient care  
14 and work life of the emergency departments' staff participating in the collaborative.  
15 Both collaboratives consisted of 3 training days and activity periods in between, with  
16 measurement for improvement being an important component of the training content.

### 17 **Researcher Reflexivity Statement**

18 The leader researcher immersed herself in the work of the National Quality  
19 Improvement Team of the Health Service Executive (HSE) Ireland to develop a  
20 deeper understanding of their work, understand the context for measurement for  
21 improvement and the aims and objectives of the training programmes. This  
22 immersion and observation provided invaluable opportunity to the researcher to  
23 observe and work on various other projects of the Evidence for Improvement team.

24

## 1 Patient and Public Involvement statement

2 No patient involved

## 3 Data Collection

4 Data collection will be conducted using multiple sources of evidence through semi-  
5 structured interviews with training participants, trainers and site coordinators and  
6 document analysis. A case study database in the form of electronic files will be  
7 maintained for the case study research. The database will have two main sections;  
8 the evidence or data collected and reports of the investigators (16).

9 The study population will include healthcare staff who were trained, those who  
10 delivered training, site coordinators of participating sites, leads of the two  
11 collaboratives in the HSE. The research will use a purposive sampling strategy by  
12 including participants who shared the common experience of the training (38).

13 Participation in the study will be on a voluntary basis and the researcher will describe  
14 the nature of the study in detail to the participants and answer all questions prior to  
15 any data collection. The National Quality Improvement Team will serve as a  
16 gatekeeper for participant recruitment for trainees and send a letter to introduce the  
17 researcher to participants. Those willing to participate would then contact the  
18 researcher and written informed consent will be obtained.

19 The data collection will be conducted via semi-structured interviews and document  
20 analysis. The interview method will allow the researcher to capture the words,  
21 thoughts, feelings, perceptions, and experiences of the participants to answer the  
22 research question (39). Information relevant to levels 1 and 2 of the Kirkpatrick  
23 Model will be extracted through document analysis while level 3 and 4 along with  
24 contextual factors (from MUSIQ framework) will be collected through interviews. The

1  
2  
3 1 research aims to recruit all trainers, both leads of the two collaboratives in the HSE,  
4  
5 2 and 10 participants from each collaborative.  
6  
7

### 8 3 **Data Processing**

10  
11 4 The interviews will be audio recorded and transcribed verbatim. A field journal will be  
12  
13 5 maintained by the researcher while interviewing which will be used to make a note of  
14  
15 6 researcher's assumptions, feelings and biases and reflections on the interviews.  
16  
17 7 After each interview, the recording will be analysed to improve the researcher's  
18  
19 8 performance as an interviewer. A case database will be maintained to store all  
20  
21 9 collected data.  
22  
23  
24  
25

### 26 10 **Data Analysis**

27  
28  
29 11 The data analysis of case studies involves a detailed description of the setting or  
30  
31 12 individuals and analysis of the data for themes or issues (40). A detailed description  
32  
33 13 of the training programme, sites and participants will be followed by a thematic  
34  
35 14 analysis of the qualitative interview data and the documents collected. The coding  
36  
37 15 and analysis framework is presented in Figure 2 (41). Coding process will be  
38  
39 16 completed using Nvivo12 (42) software. Causation coding to capture the mental  
40  
41 17 models of participants will be conducted in Microsoft Excel.  
42  
43  
44

45  
46 18 This qualitative analysis will rely on the same theoretical and analytical strategy to  
47  
48 19 study both cases and then the patterns found in each case will be compared (16).

49  
50 20 The comparison between the two cases will be performed using a meta-matrix. Meta  
51  
52 21 matrices will help assemble the descriptive data of both cases in a standard format.

53  
54 22 The next step will be to partition the data in the matrix in new ways, explore  
55  
56 23 relationships and the cluster the data so contrasts, and similarities emerge (43).  
57  
58  
59  
60

## 1 **Ensuring Rigour**

2 Rigour will be ensured by using triangulation through multiple sources of data by  
3 including perspectives of multiple stakeholders and multiple data collection methods.  
4 Data collection and analysis methods and researcher reflexivity will be clearly  
5 documented to ensure transparency. At the analysis stage, a second researcher will  
6 perform double coding on a randomly selected ten percent of the interview  
7 transcripts (44). The researchers aim to perform member checking with a broader  
8 audience through an interactive webinar. The HSE regularly conducts QI webinars  
9 and this platform would be useful for reaching healthcare professionals interested in  
10 QI and enable the researchers to obtain and incorporate feedback from a wider  
11 audience into the results. The other method of dissemination would be through peer-  
12 reviewed journal articles which would also strengthen the study. To incorporate the  
13 impact of the COVID-19 pandemic on the research process and the work practices  
14 of healthcare staff, questions to explore the role of QI education and measurement  
15 for improvement in adapting to new ways of working are included in the interview  
16 topic guide.

## 17 **DISCUSSION**

18 Qualitative and quantitative data can be used to monitor and support improvement to  
19 enhance the quality of care (45) which makes measurement for improvement an  
20 essential skill for the healthcare staff. This research aims to explore training,  
21 curricular and contextual factors that can help in the development of effective and  
22 sustainable measurement skills in healthcare staff. To our knowledge, no previous  
23 studies have evaluated measurement for improvement programmes.

1  
2  
3 1 The purpose of research should be to expand the empirical and theoretical  
4  
5 2 understanding of the research area. Empirically, this research will deepen the  
6  
7 3 understanding of contextual factors that impact programme success at various levels  
8  
9 4 of the healthcare system as referred to in the MUSIQ model as type 1, 2 and 3  
10  
11 5 contexts (33). The longitudinal study will also evaluate the programme impact in  
12  
13 6 terms of long-term factors, referred to in level 3 and 4 in the Kirkpatrick model (21).  
14  
15 7 The research also incorporates and compares perspectives from different  
16  
17 8 stakeholders which will expand the knowledge base by identifying characteristics of  
18  
19 9 individuals, teams and organizations which make them more receptive to  
20  
21 10 measurement and QI programmes. Another key output of the research will be policy  
22  
23 11 recommendations for programme development, implementation, and evaluation for  
24  
25 12 future efforts.

26  
27 13 Theoretically, it will contribute towards the current understanding of the two models.  
28  
29 14 It will add to the evidence base of MUSIQ model and confirm the existence or non-  
30  
31 15 existence of the contextual factors and relationships presented in the model. The  
32  
33 16 study uses MUSIQ model in a qualitative design while majority of the previous  
34  
35 17 studies have relied on quantitative approaches. It will study all four levels proposed  
36  
37 18 in the Kirkpatrick model which is less common in previous studies. The integrated  
38  
39 19 framework is a theoretical contribution to the field and the analysis will also reflect on  
40  
41 20 the useful and effectiveness of the approach.

42  
43 21 There is a need for further research in the evaluation of quality improvement  
44  
45 22 programmes in terms of their immediate and long-term impacts. Measurement for  
46  
47 23 improvement is an important but less explored topic in programme evaluations and  
48  
49 24 there is need to expand the understanding of what to teach, how to teach and how to  
50  
51 25 evaluate programmes that aim to train healthcare staff in quantitative and qualitative

1  
2  
3 1 data skills. Programme evaluation should be viewed as a driving force for future  
4  
5 2 programme design and policy. Instead of focusing on using standardised models,  
6  
7 3 this study takes a customised evaluation approach, appropriate to answer the  
8  
9 4 research question which is a theoretical contribution to the field. The study will  
10  
11 5 deepen the understanding of the training, curricular and contextual factors that  
12  
13 6 impact effectiveness, spread and sustainability of measurement for improvement  
14  
15 7 programmes.  
16  
17  
18  
19

## 20 8 **ETHICS AND DISSEMINATION**

21  
22  
23  
24 9 The study has received exemption from full ethical review from the Human research  
25  
26 10 ethics committee of our institution (LS-E-19-108). The results of the study will be  
27  
28 11 disseminated in peer reviewed Journals.  
29  
30

## 31 12 **REFERENCES**

- 32  
33  
34 13 1. Mosadeghrad AM. A conceptual framework for quality of care. *Mater Sociomed*  
35  
36 14 2012;24(4):251-61. doi: 10.5455/msm.2012.24.251-261 [published Online First:  
37  
38 15 2012/01/01]  
39  
40  
41  
42 16 2. Allen-Duck A, Robinson JC, Stewart MW. Healthcare Quality: A Concept Analysis.  
43  
44 17 *Nurs Forum* 2017;52(4):377-86. doi: 10.1111/nuf.12207 [published Online First:  
45  
46 18 2017/04/14]  
47  
48  
49 19 3. Smith F, Alexandersson P, Bergman B, et al. Fourteen years of quality  
50  
51 20 improvement education in healthcare: a utilisation-focused evaluation using concept  
52  
53 21 mapping. *BMJ Open Quality* 2019;8(4):e000795. doi: 10.1136/bmjopen-2019-000795  
54  
55  
56  
57  
58  
59  
60

- 1 4. O'Leary KJ, Fant AL, Thurk J, et al. Immediate and long-term effects of a team-  
2 based quality improvement training programme. *BMJ Quality & Safety*  
3 2019;28(5):366-73. doi: 10.1136/bmjqs-2018-007894
- 4 5. Sitzmann T, Weinhardt JM. Training Engagement Theory: A Multilevel Perspective  
5 on the Effectiveness of Work-Related Training. *Journal of Management*  
6 2018;44(2):732-56. doi: 10.1177/0149206315574596
- 7 6. Silver SA, McQuillan R, Harel Z, et al. How to Sustain Change and Support  
8 Continuous Quality Improvement. *Clinical journal of American Society of Nephrology*  
9 2016;11:916–24.
- 10 7. The health foundation. Quality improvement training for healthcare  
11 professionals. Evidence Scan. United Kingdom: The Health Foundation, 2012.
- 12 8. Varkey P, Reller MK, Resar RK. Basics of quality improvement in health care.  
13 *Mayo Clin Proc.* England2007:735-9.
- 14 9. Crotty M. *The Foundations of Social Research: Meaning and Perspective in the*  
15 *Research Process.* Thousands Oaks California: Sage Publications 1998.
- 16 10. Christ TW. The worldview matrix as a strategy when designing mixed methods  
17 research. *International Journal of Multiple Research Approaches* 2013;7(1):110-18.  
18 doi: 10.5172/mra.2013.7.1.110
- 19 11. Saunders M, Lewis P, Thornhill A. *Research methods for business students.*  
20 *Seventh ed.* Harlow: Pearson Education Limited 2016.
- 21 12. Merriam SB. *Qualitative research and case study applications in education.* In:  
22 Merriam SB, ed. 2nd ed. ed. San Francisco :: Jossey-Bass Publishers, 1998.



- 1  
2  
3 1 13. Anderson C. Presenting and evaluating qualitative research. American journal of  
4  
5 2 pharmaceutical education 2010;74(8):141-41. doi: 10.5688/aj7408141  
6  
7
- 8 3 14. Simons H. Case study research in practice. London;Los Angeles;; SAGE 2009.  
9
- 10  
11 4 15. Luck L, Jackson D, Usher K. Case study: a bridge across the paradigms. Nursing  
12  
13 5 Inquiry 2006;13(2):103-09. doi: 10.1111/j.1440-1800.2006.00309.x  
14  
15
- 16 6 16. Yin RK. Case Study Research: Design and Methods. Third ed: SAGE  
17  
18 7 Publications 2003.  
19
- 20  
21  
22 8 17. Marguerite F. Evaluation of training and development programs: A review of the  
23  
24 9 literature. Australasian Journal of Educational Technology 1989;5(2) doi:  
25  
26 10 10.14742/ajet.2340  
27  
28
- 29 11 18. Cook DA. Twelve tips for evaluating educational programs. Medical Teacher  
30  
31 12 2010;32(4):296-301. doi: 10.3109/01421590903480121  
32  
33
- 34  
35 13 19. Yardley S, Dornan T. Kirkpatrick's levels and education 'evidence'. Med Educ  
36  
37 14 2012;46(1):97-106. doi: 10.1111/j.1365-2923.2011.04076.x [published Online First:  
38  
39 15 2011/12/14]  
40  
41
- 42 16 20. Frye AW, Hemmer PA. Program evaluation models and related theories: AMEE  
43  
44 17 guide no. 67. Med Teach 2012;34(5):e288-99. doi: 10.3109/0142159x.2012.668637  
45  
46 18 [published Online First: 2012/04/21]  
47  
48
- 49  
50 19 21. Kirkpatrick DL. Techniques for Evaluation Training Programs. Journal of the  
51  
52 20 American Society of Training Directors 1959;13:21-26.  
53  
54
- 55 21 22. Kaplan HC, Provost LP, Froehle CM, et al. The Model for Understanding  
56  
57 22 Success in Quality (MUSIQ): building a theory of context in healthcare quality  
58  
59  
60

- 1  
2  
3 1 improvement. *BMJ Quality & Safety* 2012;21(1):13-20. doi: 10.1136/bmjqs-2011-  
4  
5 2 000010  
6  
7  
8 3 23. Heydari MR, Taghva F, Amini M, et al. Using Kirkpatrick's model to measure the  
9  
10 4 effect of a new teaching and learning methods workshop for health care staff. *BMC*  
11  
12  
13 5 *Research Notes* 2019;12(1):388. doi: 10.1186/s13104-019-4421-y  
14  
15  
16 6 24. Bates R. A critical analysis of evaluation practice: the Kirkpatrick model and the  
17  
18 7 principle of beneficence. *Evaluation and Program Planning* 2004;27(3):341-47. doi:  
19  
20 8 <https://doi.org/10.1016/j.evalprogplan.2004.04.011>  
21  
22  
23 9 25. Alliger GM, Janak EA. KIRKPATRICK'S LEVELS OF TRAINING CRITERIA:  
24  
25 10 THIRTY YEARS LATER. *Personnel Psychology* 1989;42(2):331-42. doi:  
26  
27 11 10.1111/j.1744-6570.1989.tb00661.x  
28  
29  
30  
31 12 26. Parker K, Burrows G, Nash H, et al. Going beyond Kirkpatrick in evaluating a  
32  
33 13 clinician scientist program: it's not "if it works" but "how it works". *Acad Med*  
34  
35 14 2011;86(11):1389-96. doi: 10.1097/ACM.0b013e31823053f3 [published Online First:  
36  
37 15 2011/09/29]  
38  
39  
40  
41 16 27. Moldovan L. Training Outcome Evaluation Model. *Procedia Technology*  
42  
43 17 2016;22:1184-90. doi: <https://doi.org/10.1016/j.protcy.2016.01.166>  
44  
45  
46 18 28. Pettigrew A, Ferlie E, McKee L. Shaping strategic change - The case of the NHS  
47  
48 19 in the 1980s. *Public Money & Management* 1992;12(3):27-31. doi:  
49  
50 20 10.1080/09540969209387719  
51  
52  
53  
54 21 29. Wiig S, Aase K, Johannessen T, et al. How to deal with context? A context-  
55  
56 22 mapping tool for quality and safety in nursing homes and homecare (SAFE-LEAD  
57  
58 23 Context). *BMC Research Notes* 2019;12(1):259. doi: 10.1186/s13104-019-4291-3  
59  
60

- 1  
2  
3 1 30. Hovlid E, Bukve O. A qualitative study of contextual factors' impact on measures  
4  
5 2 to reduce surgery cancellations. BMC Health Services Research 2014;14(1):215.  
6  
7 3 doi: 10.1186/1472-6963-14-215  
8  
9  
10 4 31. Øvretveit JC, Shekelle PG, Dy SM, et al. How does context affect interventions to  
11  
12 5 improve patient safety? An assessment of evidence from studies of five patient  
13  
14 6 safety practices and proposals for research. BMJ Quality & Safety 2011;20(7):604-  
15  
16 7 10. doi: 10.1136/bmjqs.2010.047035  
17  
18  
19 8 32. Coles E, Wells M, Maxwell M, et al. The influence of contextual factors on  
20  
21 9 healthcare quality improvement initiatives: what works, for whom and in what  
22  
23 10 setting? Protocol for a realist review. Systematic Reviews 2017;6(1):168. doi:  
24  
25 11 10.1186/s13643-017-0566-8  
26  
27  
28 12 33. Reed JE, Kaplan HC, Ismail SA. A new typology for understanding context:  
29  
30 13 qualitative exploration of the model for understanding success in quality (MUSIQ).  
31  
32 14 BMC Health Serv Res 2018;18(1):584. doi: 10.1186/s12913-018-3348-7 [published  
33  
34 15 Online First: 2018/07/27]  
35  
36  
37 16 34. Griffin A, McKeown A, Viney R, et al. Revalidation and quality assurance: the  
38  
39 17 application of the MUSIQ framework in independent verification visits to healthcare  
40  
41 18 organisations. BMJ Open 2017;7(2):e014121. doi: 10.1136/bmjopen-2016-014121  
42  
43 19 [published Online First: 2017/02/16]  
44  
45  
46 20 35. Eboreime EA, Nxumalo N, Ramaswamy R, et al. Strengthening decentralized  
47  
48 21 primary healthcare planning in Nigeria using a quality improvement model: how  
49  
50 22 contexts and actors affect implementation. Health Policy Plan 2018;33(6):715-28.  
51  
52 23 doi: 10.1093/heapol/czy042 [published Online First: 2018/05/10]  
53  
54  
55  
56  
57  
58  
59  
60

- 1  
2  
3 1 36. Dahiya S, Jha A. Review of training evaluation. International Journal of Computer  
4  
5 2 Science and Communication 2011;2(1):11– 16.  
6  
7  
8 3 37. Moore G, Carton M, Cosgrove G, et al. Measurement for Improvement  
9  
10 4 Curriculum: A reference document to support consistent measurement for  
11  
12 5 improvement training in Irish Healthcare: Measurement for Improvement, Health  
13  
14 6 Service Executive, 2017.  
15  
16  
17 7 38. Newell R, Burnard P. Research for evidence-based practice in healthcare.  
18  
19 8 Chichester: Wiley-Blackwell 2011.  
20  
21  
22 9 39. Holloway I. Qualitative Research In Health Care: Open University Press 2005.  
23  
24  
25 10 40. Stake R. The art of case study research. Thousand Oaks, California: Sage  
26  
27 11 Publications 1995.  
28  
29  
30 12 41. Saldana J. The coding manual for qualitative researchers. 3rd ed. Los Angeles:  
31  
32 13 SAGE 2015.  
33  
34  
35 14 42. NVivo qualitative data analysis software [program]. Version 12 version, 2018.  
36  
37  
38 15 43. Miles MB, Huberman M. Qualitative data analysis: an expanded source-book.  
39  
40 16 Second ed. Thousand Oaks California: Sage Publications 1994:338.  
41  
42  
43 17 44. Mays N, Pope C. Assessing quality in qualitative research. BMJ  
44  
45 18 2000;320(7226):50-52. doi: 10.1136/bmj.320.7226.50  
46  
47  
48 19 45. Shah A. Using data for improvement. BMJ 2019;364:l189. doi: 10.1136/bmj.l189  
49  
50  
51  
52  
53 20  
54  
55  
56 21  
57  
58  
59 22  
60

## 1        1        **AUTHORS' CONTRIBUTIONS**

2        2        ZK developed the methodology and prepared the initial draft in consultation with  
3        3        ADB and EM. ADB and EM provided substantive feedback on the draft which was  
4        4        revised by ZK. All authors have read and approved the final manuscript.

## 5        5        **FUNDING STATEMENT**

6        6        The corresponding author (ZK) is receiving a PhD funding from the Health Service  
7        7        Executive Ireland (Project reference 57399). The study is also supported by the Irish  
8        8        Health Research Board (RL-2015-1588). The funding sources had no influence on  
9        9        the design of this study, analyses, interpretation of the data, or decision to publish  
10      10      results.

## 11      11      **COMPETING INTERESTS**

12      12      The authors have no competing interests to declare.

1  
2  
3  
4  
5  
6  
7  
8  
9  
10  
11  
12  
13  
14  
15  
16  
17  
18  
19  
20  
21  
22  
23  
24  
25  
26  
27  
28  
29  
30  
31  
32  
33  
34  
35  
36  
37  
38  
39  
40  
41  
42  
43  
44  
45  
46  
47  
48  
49  
50  
51  
52  
53  
54  
55  
56  
57  
58  
59  
60

## FIGURE TITLES AND LEGENDS

1  
2  
3  
4  
5  
6  
7  
8  
9  
10  
11  
12  
13  
14  
15  
16  
17  
18  
19  
20  
21  
22  
23  
24  
25  
26  
27  
28  
29  
30  
31  
32  
33  
34  
35  
36  
37  
38  
39  
40  
41  
42  
43  
44  
45  
46  
47  
48  
49  
50  
51  
52  
53  
54  
55  
56  
57  
58  
59  
60

### FIGURE 1

**Title:** Research design choices through an adaptation of Saunders' research onion

**Legend:** Flow chart of Research design choices for the study through an adaptation of Saunders' research onion

### FIGURE 2

**Title:** Coding and Analysis Framework

**Legend:** Description of coding and analysis steps adapted from Johnny Saldana's coding methodology

1  
2  
3  
4  
5  
6  
7  
8  
9  
10  
11  
12  
13  
14  
15  
16  
17  
18  
19  
20  
21  
22  
23  
24  
25  
26  
27  
28  
29  
30  
31  
32  
33  
34  
35  
36  
37  
38  
39  
40  
41  
42  
43  
44  
45  
46  
47  
48  
49  
50  
51  
52  
53  
54  
55  
56  
57  
58  
59  
60

**Figure 1**

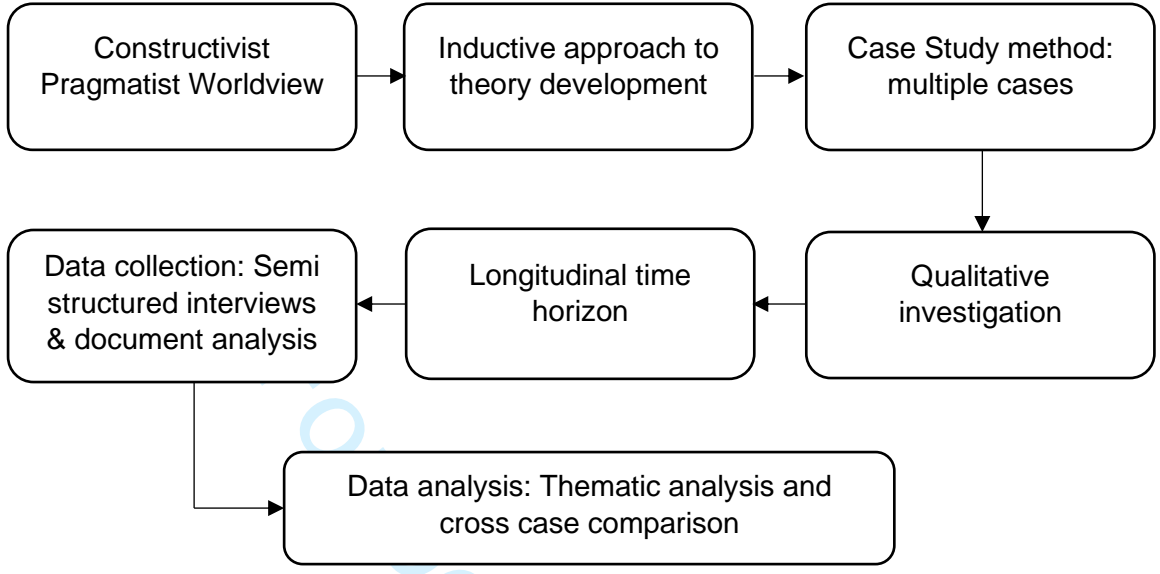

Figure 2

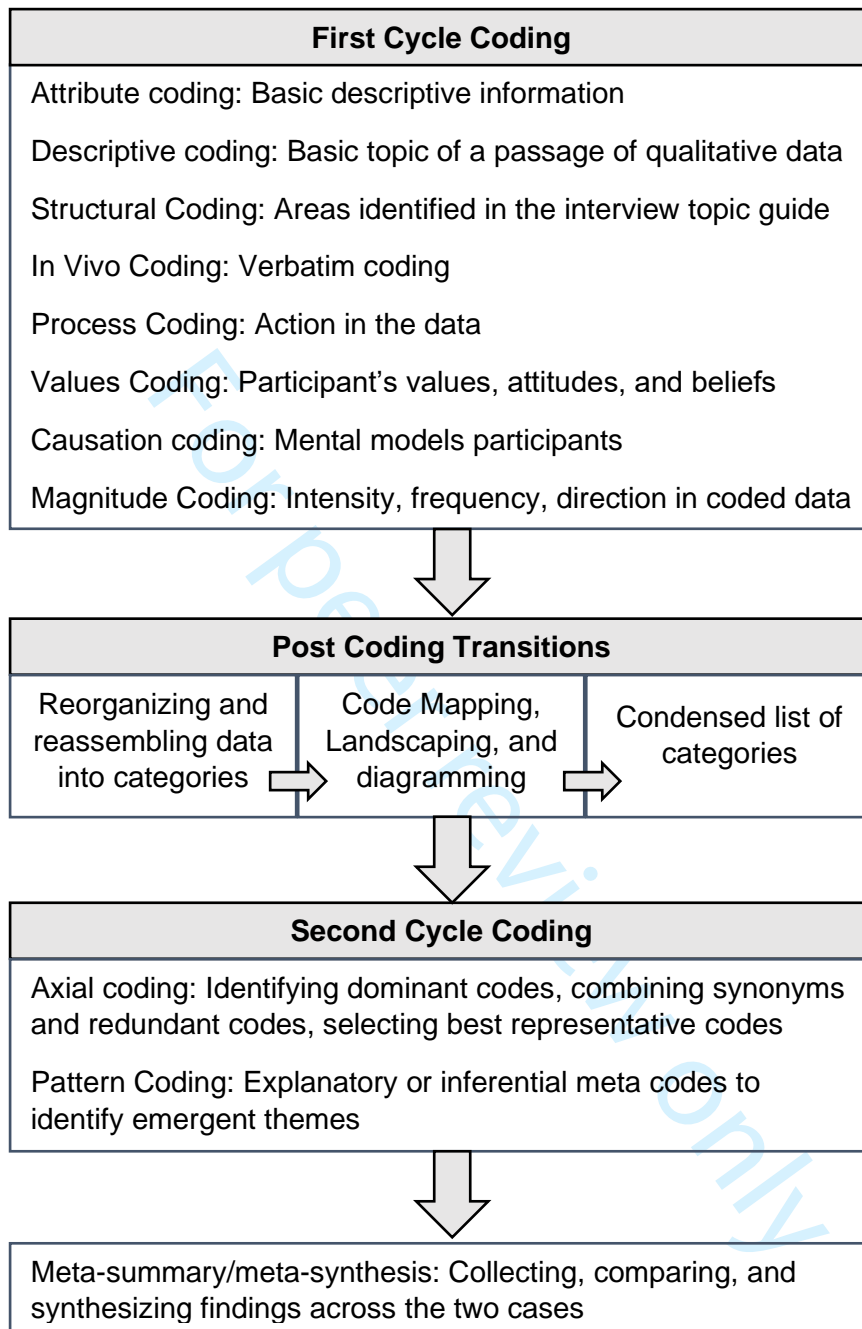



## Supplementary File 1: Sample interview topic guide for collaborative trainees

### Introduction

- What is your professional background and what is your current job role?
- How did you become a part of the PUTZ/microsystems collaborative?
- What were your expectations regarding learning measurement for improvement/QI during the training?
- Did you have any knowledge of or experience in using measurement/QI techniques prior to the collaborative?

### Effectiveness

- Looking back, how would you assess the suitability of the collaborative for your needs?
  - PROBES
  - Session content
  - Session format/logistics
  - Coaching and support
- If you can recall, which concepts were easier to understand for the team and which areas you struggled with?
- Did you find the measurement techniques to be useful to your work?
- What factors could have made the training more effective and usable for you?
- What challenges/barriers did you face while implementation?

### Sustainability

- Do you think you have been able to retain the skills 2 years after the collaborative?
  - PROBES
  - Retention as a team
- Do you still use some or all the skills in your work? Could you give some examples?
- Do you think the training gave you an advantage over staff who did not attend the training?
- What motivated you to sustain this knowledge?
- What factors facilitated sustaining these skills in the long term?

- PROBES
- Support from senior and frontline managers
- Data Infrastructure within organization
- Resource availability
- External and Internal motivating factors
- Team capacity
- Would you like to remain involved in work that requires the use of these skills?
- Would you like to enhance your measurement/QI skills further?

### **Spread**

- Have you shared your knowledge with colleagues in your own team and department? If yes, what means (formal or informal) used to spread this knowledge?
- Would you say all members of the team, regardless of their participation in the training, feel comfortable applying these skills?
- Have you shared your knowledge with those outside the team, department, or organization?
- What motivates you to share knowledge with others?
- Would you know others, within the organization or outside, who are experts in measurement and QI methods, and do you consult them if there is a need?
- What were the challenges in spreading knowledge?
- What were the enablers in spreading knowledge?
  - PROBES
  - Role of leaders
  - Supportive culture of the organization
  - Availability of resources

### **COVID-19**

- Have there been any changes in the way you or your teamwork during the pandemic?
  - PROBE
  - Organizational level changes

- Did your QI and measurement skills help you in changing and adapting to the new clinical pathways? Did you use any QI or measurement skills, approaches or tools during this time?
- What support in QI methods and knowledge could have made this transition easier for you?
- For the foreseeable future it is likely that training will be delivered virtually - what would be your opinion on distance learning for QI and measurement skills
- Is there anything else you would like to add that could help improve the training?

## Standards for Reporting Qualitative Research (SRQR)\*

<http://www.equator-network.org/reporting-guidelines/srqr/>

Page/line no(s).

### Title and abstract

|                                                                                                                                                                                                                                                              |               |
|--------------------------------------------------------------------------------------------------------------------------------------------------------------------------------------------------------------------------------------------------------------|---------------|
| <p><b>Title</b> - Concise description of the nature and topic of the study Identifying the study as qualitative or indicating the approach (e.g., ethnography, grounded theory) or data collection methods (e.g., interview, focus group) is recommended</p> | <p>Page 1</p> |
| <p><b>Abstract</b> - Summary of key elements of the study using the abstract format of the intended publication; typically includes background, purpose, methods, results, and conclusions</p>                                                               | <p>Page 3</p> |

### Introduction

|                                                                                                                                                                     |               |
|---------------------------------------------------------------------------------------------------------------------------------------------------------------------|---------------|
| <p><b>Problem formulation</b> - Description and significance of the problem/phenomenon studied; review of relevant theory and empirical work; problem statement</p> | <p>Page 4</p> |
| <p><b>Purpose or research question</b> - Purpose of the study and specific objectives or questions</p>                                                              | <p>Page 5</p> |

### Methods

|                                                                                                                                                                                                                                                                                                                                                                                                             |                |
|-------------------------------------------------------------------------------------------------------------------------------------------------------------------------------------------------------------------------------------------------------------------------------------------------------------------------------------------------------------------------------------------------------------|----------------|
| <p><b>Qualitative approach and research paradigm</b> - Qualitative approach (e.g., ethnography, grounded theory, case study, phenomenology, narrative research) and guiding theory if appropriate; identifying the research paradigm (e.g., postpositivist, constructivist/ interpretivist) is also recommended; rationale**</p>                                                                            | <p>Page 6</p>  |
| <p><b>Researcher characteristics and reflexivity</b> - Researchers' characteristics that may influence the research, including personal attributes, qualifications/experience, relationship with participants, assumptions, and/or presuppositions; potential or actual interaction between researchers' characteristics and the research questions, approach, methods, results, and/or transferability</p> | <p>Page 16</p> |
| <p><b>Context</b> - Setting/site and salient contextual factors; rationale**</p>                                                                                                                                                                                                                                                                                                                            | <p>Page 15</p> |
| <p><b>Sampling strategy</b> - How and why research participants, documents, or events were selected; criteria for deciding when no further sampling was necessary (e.g., sampling saturation); rationale**</p>                                                                                                                                                                                              | <p>Page 17</p> |
| <p><b>Ethical issues pertaining to human subjects</b> - Documentation of approval by an appropriate ethics review board and participant consent, or explanation for lack thereof; other confidentiality and data security issues</p>                                                                                                                                                                        | <p>Page 21</p> |
| <p><b>Data collection methods</b> - Types of data collected; details of data collection procedures including (as appropriate) start and stop dates of data collection and analysis, iterative process, triangulation of sources/methods, and modification of procedures in response to evolving study findings; rationale**</p>                                                                             | <p>Page 17</p> |

|                       |                                                                                                                                                                                                                                                       |                                |
|-----------------------|-------------------------------------------------------------------------------------------------------------------------------------------------------------------------------------------------------------------------------------------------------|--------------------------------|
| 1<br>2<br>3<br>4<br>5 | <b>Data collection instruments and technologies</b> - Description of instruments (e.g., interview guides, questionnaires) and devices (e.g., audio recorders) used for data collection; if/how the instrument(s) changed over the course of the study | Page 17<br>Supplemental file 1 |
| 6<br>7<br>8           | <b>Units of study</b> - Number and relevant characteristics of participants, documents, or events included in the study; level of participation (could be reported in results)                                                                        | Page 16<br>Page 17             |
| 9<br>10<br>11<br>12   | <b>Data processing</b> - Methods for processing data prior to and during analysis, including transcription, data entry, data management and security, verification of data integrity, data coding, and anonymization/de-identification of excerpts    | Page 18                        |
| 13<br>14<br>15<br>16  | <b>Data analysis</b> - Process by which inferences, themes, etc., were identified and developed, including the researchers involved in data analysis; usually references a specific paradigm or approach; rationale**                                 | Page 18                        |
| 17<br>18<br>19<br>20  | <b>Techniques to enhance trustworthiness</b> - Techniques to enhance trustworthiness and credibility of data analysis (e.g., member checking, audit trail, triangulation); rationale**                                                                | Page 19                        |

## Results/findings

|                      |                                                                                                                                                                                                   |    |
|----------------------|---------------------------------------------------------------------------------------------------------------------------------------------------------------------------------------------------|----|
| 23<br>24<br>25<br>26 | <b>Synthesis and interpretation</b> - Main findings (e.g., interpretations, inferences, and themes); might include development of a theory or model, or integration with prior research or theory | NA |
| 27<br>28<br>29       | <b>Links to empirical data</b> - Evidence (e.g., quotes, field notes, text excerpts, photographs) to substantiate analytic findings                                                               | NA |

## Discussion

|                                  |                                                                                                                                                                                                                                                                                                                                                                                                             |         |
|----------------------------------|-------------------------------------------------------------------------------------------------------------------------------------------------------------------------------------------------------------------------------------------------------------------------------------------------------------------------------------------------------------------------------------------------------------|---------|
| 32<br>33<br>34<br>35<br>36<br>37 | <b>Integration with prior work, implications, transferability, and contribution(s) to the field</b> - Short summary of main findings; explanation of how findings and conclusions connect to, support, elaborate on, or challenge conclusions of earlier scholarship; discussion of scope of application/generalizability; identification of unique contribution(s) to scholarship in a discipline or field | Page 19 |
| 38<br>39                         | <b>Limitations</b> - Trustworthiness and limitations of findings                                                                                                                                                                                                                                                                                                                                            | Page 4  |

## Other

|                |                                                                                                                                               |         |
|----------------|-----------------------------------------------------------------------------------------------------------------------------------------------|---------|
| 42<br>43<br>44 | <b>Conflicts of interest</b> - Potential sources of influence or perceived influence on study conduct and conclusions; how these were managed | Page 27 |
| 45<br>46       | <b>Funding</b> - Sources of funding and other support; role of funders in data collection, interpretation, and reporting                      | Page 27 |

\*The authors created the SRQR by searching the literature to identify guidelines, reporting standards, and critical appraisal criteria for qualitative research; reviewing the reference lists of retrieved sources; and contacting experts to gain feedback. The SRQR aims to improve the transparency of all aspects of qualitative research by providing clear standards for reporting qualitative research.

1  
2  
3  
4  
5  
6  
7  
8  
9  
10  
11  
12  
13  
14  
15  
16  
17  
18  
19  
20  
21  
22  
23  
24  
25  
26  
27  
28  
29  
30  
31  
32  
33  
34  
35  
36  
37  
38  
39  
40  
41  
42  
43  
44  
45  
46  
47  
48  
49  
50  
51  
52  
53  
54  
55  
56  
57  
58  
59  
60

\*\*The rationale should briefly discuss the justification for choosing that theory, approach, method, or technique rather than other options available, the assumptions and limitations implicit in those choices, and how those choices influence study conclusions and transferability. As appropriate, the rationale for several items might be discussed together.

**Reference:**

O'Brien BC, Harris IB, Beckman TJ, Reed DA, Cook DA. **Standards for reporting qualitative research: a synthesis of recommendations.** *Academic Medicine*, Vol. 89, No. 9 / Sept 2014  
DOI: 10.1097/ACM.0000000000000388

For peer review only

# BMJ Open

**Protocol for an integrated evaluation framework to study training, curricular and contextual factors impacting the success of a Measurement for Improvement training programme for healthcare staff in Ireland.**

|                                 |                                                                                                                                                                                                                                                                                           |
|---------------------------------|-------------------------------------------------------------------------------------------------------------------------------------------------------------------------------------------------------------------------------------------------------------------------------------------|
| Journal:                        | <i>BMJ Open</i>                                                                                                                                                                                                                                                                           |
| Manuscript ID                   | bmjopen-2020-047639.R1                                                                                                                                                                                                                                                                    |
| Article Type:                   | Protocol                                                                                                                                                                                                                                                                                  |
| Date Submitted by the Author:   | 19-Aug-2021                                                                                                                                                                                                                                                                               |
| Complete List of Authors:       | Khurshid, Zuneera; University College Dublin, School of Nursing Midwifery and Health Systems<br>De Brún, Aoife; University College Dublin, School of Nursing, Midwifery & Health Systems<br>McAuliffe, Eilish; University College Dublin, School of Nursing, Midwifery and Health Systems |
| <b>Primary Subject Heading</b>: | Health services research                                                                                                                                                                                                                                                                  |
| Secondary Subject Heading:      | Medical education and training, Qualitative research, Research methods                                                                                                                                                                                                                    |
| Keywords:                       | Quality in health care < HEALTH SERVICES ADMINISTRATION & MANAGEMENT, EDUCATION & TRAINING (see Medical Education & Training), QUALITATIVE RESEARCH                                                                                                                                       |
|                                 |                                                                                                                                                                                                                                                                                           |

SCHOLARONE™  
Manuscripts

1  
2  
3 1 **TITLE**  
4

5  
6 2 Protocol for an integrated evaluation framework to study training, curricular and contextual  
7  
8 3 factors impacting the success of a Measurement for Improvement training programme for  
9  
10 4 healthcare staff in Ireland.  
11

12  
13 5 **AUTHORS**  
14

15  
16 6 **CORRESPONDING AUTHOR**  
17

18 7 **Full name:** Zuneera Khurshid  
19

20  
21 8 **Institutional Address:** Room B111, UCD Centre for Interdisciplinary Research, Education,  
22  
23 9 and Innovation in Health Systems (UCD IRIS) at the School of Nursing, Midwifery and  
24  
25 10 Health Systems, University College Dublin, Dublin, Ireland.  
26

27  
28 11 **e-mail:** zuneera.khurshid@ucdconnect.ie  
29

30  
31 12 **Telephone:** +353 85 8666598  
32

33  
34 13 **Fax number:** NA  
35

36  
37 14 **City:** Dublin  
38

39  
40 15 **Country:** Ireland  
41

42 16 **Postal Address:** Room B111, UCD Centre for Interdisciplinary Research, Education, and  
43  
44 17 Innovation in Health Systems (UCD IRIS) at the School of Nursing, Midwifery and Health  
45  
46 18 Systems, University College Dublin, Dublin, Ireland.  
47

48  
49 19 **CO-AUTHOR-1**  
50

51  
52 20 **Full name:** Dr Aoife De Brún  
53

54  
55 21 **Institutional Address:** UCD Centre for Interdisciplinary Research, Education, and  
56  
57 22 Innovation in Health Systems (UCD IRIS) at the School of Nursing, Midwifery and Health  
58  
59 23 Systems, University College Dublin, Dublin, Ireland  
60



1  
2  
3 1 **City:** Dublin  
4

5  
6 2 **Country:** Ireland  
7

8  
9 3 **email:** aoife.debrun@ucd.ie  
10

11 4 **CO-AUTHOR-2**  
12

13  
14 5 **Full name:** Professor Eilish McAuliffe  
15

16 6 **Institutional Address:** UCD Centre for Interdisciplinary Research, Education, and  
17  
18 7 Innovation in Health Systems (UCD IRIS) at the School of Nursing, Midwifery and Health  
19  
20 8 Systems, University College Dublin, Dublin, Ireland.  
21

22  
23 9 **City:** Dublin  
24

25  
26 10 **Country:** Ireland  
27

28  
29 11 **email:** eilish.mcauliffe@ucd.ie  
30

31 12 **KEYWORDS**  
32

33  
34 13 Quality improvement, QI, programme evaluation, measurement for improvement, qualitative  
35  
36 14 research  
37

38  
39 15 **WORD COUNT**  
40

41  
42 16 3876 (excluding title page, references, figures, and tables)  
43  
44  
45 17  
46  
47 18  
48  
49 19  
50  
51 20  
52  
53  
54  
55  
56 21  
57  
58  
59 22  
60

## 1      1    **ABSTRACT**

2      2    **Introduction:** Measurement for improvement is the process of collecting, analysing, and  
3      3    presenting data to demonstrate whether a change has resulted in an improvement. This  
4      4    makes measurement for improvement a core element in quality improvement (QI) efforts.  
5      5    However, there is little to no research investigating factors that influence the development  
6      6    and use of measurement for improvement skills in healthcare staff. The overall aim of this  
7      7    research is to understand the training, curricular and contextual factors that influence the  
8      8    success of measurement for improvement training by utilising the experiences of trainees,  
9      9    trainers, programme, and site coordinators. This paper focuses on describing an integrated  
10     10    evaluation framework to address this research aim.

11     11    **Methods and analysis:** This research will adopt a qualitative retrospective case-study  
12     12    design based on constructivist-pragmatic philosophy. The Pressure Ulcers to Zero  
13     13    collaborative (PUTZ) and Clinical Microsystems collaborative from the Irish health system  
14     14    which included a measurement for improvement component have been selected for this  
15     15    study. This paper presents an integrated approach proposing a novel application of two pre-  
16     16    existing frameworks: The Model for Understanding Success in Quality (MUSIQ) framework  
17     17    and the Kirkpatrick Evaluation Model to evaluate an unexplored QI context and programme.  
18     18    A thematic analysis of the qualitative interview data and the documents collected will be  
19     19    conducted. The thematic analysis is based on a four-step coding framework adapted for this  
20     20    research study. The coding process will be conducted using NVivo12 software and Microsoft  
21     21    Excel. A cross-case comparison between the two cases will be performed.

22     22    **Ethics and dissemination:** The study has received an exemption from full ethical review  
23     23    from the Human research ethics committee of our institution (LS-E-19-108). Informed  
24     24    consent will be obtained from all participants and the data will be anonymised and stored  
25     25    securely. The results of the study will be disseminated in peer-reviewed Journals.

26

## 1 STRENGTHS AND LIMITATIONS OF THIS STUDY

- 2 • Study rigour will be ensured by triangulating multiple data sources, including  
3 perspectives of multiple stakeholders, multiple data collection methods and double  
4 coding.
- 5 • The researchers aim to perform member checking with a broader audience through  
6 an interactive webinar.
- 7 • The study design is responsive to the current situation and explores the role of  
8 Quality Improvement (QI) education and measurement for improvement in adapting  
9 to new ways of working during COVID-19.
- 10 • This study will deepen the understanding of contextual factors that impact QI and  
11 measurement programme success at various levels of the healthcare system.
- 12 • The major limitation is recall bias as the training programmes being evaluated were  
13 completed more than 2 years ago however this was countered by providing sufficient  
14 time to participants to think about the programme before the interview and providing  
15 the opportunity to contact the researcher afterwards if they recalled something  
16 important later.

## 17 INTRODUCTION

18 Quality in healthcare is a subjective, complex, and multi-dimensional concept which makes it  
19 difficult to define and measure (1). The common defining attributes of healthcare quality in  
20 research include the delivery of effective and safe care to attain desired outcomes and a  
21 culture of excellence (2). In his pioneering work on healthcare quality, Donabedian described  
22 high quality healthcare as the type of care which maximises patient welfare while accounting  
23 for the expected gains and losses using legitimate means (3). The concept of quality has  
24 evolved since then. The Health Foundation defines healthcare quality as the ability of  
25 healthcare services to deliver the desired health outcomes consistent with recent  
26 professional knowledge, to individuals and populations (4). Similarly, there are various

1  
2  
3 1 definitions of QI. One simple way to define QI is considering it an approach for improving  
4  
5 2 health service systems and processes through the routine use of health and programme  
6  
7 3 data to meet patient and programme needs (5). These definitions of quality and QI reveal the  
8  
9 4 central role of measurement for improvement in the improvement process. Measurement for  
10  
11 5 improvement refers to the process of collecting, analysing, and presenting quantitative and  
12  
13 6 qualitative data to demonstrate whether a change has resulted in an improvement (6).

14  
15  
16 7 Despite its importance, measurement for improvement is a less explored topic in QI research  
17  
18 8 and there is a need for further research in the area. With the growing importance of QI  
19  
20 9 knowledge in healthcare, there is a developing research interest in the QI curricula content,  
21  
22 10 the effectiveness of educational design and its link with organisational performance (7).

23  
24 11 However, most QI programme evaluations focus on the improvement of knowledge, skills  
25  
26 12 and confidence of learners and do not offer insights into clinical and long-term effects (8).

27  
28 13 Additionally, the measurement for improvement component is rarely evaluated.

29  
30  
31 14 Existing models of training programme evaluation often have a narrow focus; they are  
32  
33 15 effective in measuring the outputs (what works) but do not provide insights into the process  
34  
35 16 that leads to training effectiveness (how it works) (9, 10). This highlights the need for  
36  
37 17 evaluation approaches that explore the processes that led to improvements. The impact of  
38  
39 18 contextual factors such as environment, management support and leadership, organisational  
40  
41 19 culture and data infrastructure also remains largely unexplored (11). There is also ambiguity  
42  
43 20 around the quality and effectiveness of the programmes and how the concepts and methods  
44  
45 21 are taught (12). One crucial aspect of improvement work is measurement. Measurement is  
46  
47 22 an important element in QI efforts as change needs to be measured to demonstrate  
48  
49 23 improvement and to identify and respond to variation (13). Learning how to measure quality  
50  
51 24 is an important skill for healthcare staff in general and those involved in QI in particular.

52  
53  
54  
55 25 A systematic literature review revealed that there are no QI programme evaluation studies  
56  
57 26 focusing on evaluating the factors that influence development and use of measurement for  
58  
59 27 improvement skills of healthcare staff (14). There is a need to evaluate the effectiveness,  
60

1 sustainability and spread of measurement for improvement programmes but there is  
2 uncertainty around evaluation outcomes and methods. Measurement often gets  
3 overshadowed by the overall focus on understanding QI and on outcomes, resulting in a  
4 dearth of measurement for improvement research. Quality measurement is frequently  
5 treated as an ancillary matter in healthcare systems' approach to QI (15). Research to  
6 explore factors that will enable healthcare staff to embrace measurement for improvement  
7 and appreciate its value in demonstrating outcomes is needed. In addition to this, many QI  
8 teams are failing to fully implement measurement tools and techniques (16). Despite this  
9 identified gap in measurement skills, there is little to no research exploring ways to develop  
10 measurement for improvement skills in staff or to better understand the factors that influence  
11 the development of these skills.

12 The overall aim of this research is to understand the training, curricular and contextual  
13 factors that inhibit or enable the success of measurement for improvement training by  
14 utilising the experiences of trainees, trainers, programme, and site coordinators. The  
15 research will be conducted in the Irish health system using two QI collaboratives (Pressure  
16 Ulcers to Zero and Clinical Microsystems) which included dedicated training on  
17 measurement for improvement. This paper presents an integrated evaluation framework  
18 developed to address this research aim. This research started in August 2020 and is  
19 expected to be completed by December 2021.

## 20 **METHODS**

### 21 **Theoretical underpinning**

22 The underlying assumption of this research is that to make sense of the problem, the views  
23 of stakeholders about the training programme and the context, which aligns with the  
24 constructivist worldview. The constructivist worldview asserts that humans construct  
25 meaning when they interact with the world and are influenced by historical and social  
26 perspectives and context (17). Another objective of this research is to investigate what works

1  
2  
3 1 in a certain situation and why and then use this knowledge to develop solutions, linking the  
4  
5 2 research outcomes to recommended actions which is a characteristic of the pragmatist  
6  
7 3 worldview. The pragmatist worldview believes in the presence of multiple forms of reality and  
8  
9 4 that theories are extracted from actions and then applied back in practice through an  
10  
11 5 iterative process (18). This research thus contains elements from pragmatist and  
12  
13 6 constructivist viewpoints.

14  
15  
16 7 This is an exploratory study that uses an inductive approach to explore the research problem  
17  
18 8 to understanding of measurement for improvement programme effectiveness, sustainability  
19  
20 9 spread and evaluation methods (19). Out of the various approaches to do case study  
21  
22 10 research, a pragmatic constructivist approach which asserts that reality is constructed  
23  
24 11 socially and experientially and propagates the use of methods which focus on inductive  
25  
26 12 reasoning and interpretation rather than testing hypotheses, aligns closely with this research  
27  
28 13 (20). This research explores complex contextual and human factors in a real-world  
29  
30 14 healthcare setting making it suitable for a qualitative inquiry (21). This research aim requires  
31  
32 15 a research design that can capture the complexity of the healthcare system, the factors that  
33  
34 16 impact programme development, implementation and evaluation and provide evidence for  
35  
36 17 policy action. A case study design can capture the complexity of individual behaviour in  
37  
38 18 institutional settings, factors that influence these, interrelationship of actions and  
39  
40 19 consequences, perceptions about programme goals from the perspective of those who  
41  
42 20 designed it and those who implemented it to provide an evidence base for decision-making  
43  
44 21 and explain success or failure (22). Thus, a case study design will be adopted to capture the  
45  
46 22 information required to adequately address this research question.

47  
48  
49  
50  
51 23 Case-study methodology is a bridge between research paradigms and offers flexibility in  
52  
53 24 epistemology, ontology, and methodology by providing a well-defined boundary and  
54  
55 25 structure within which appropriate methods can be applied (23). The aim of this study is to  
56  
57 26 gain an in-depth understanding of the factors that influence measurement for improvement  
58  
59 27 skill development and use in the real-world context which makes case study research a  
60

1 suitable choice (24). Figure 1 summarises the research design choices in this research  
2 through an adaptation of Saunders' research onion (19).

### 3 **Framework development process**

4 Programme evaluation should not be considered just a set of techniques but utilised as an  
5 integrated approach which is intricately linked with needs assessment, course design,  
6 course presentation, and transfer of training (25). It may be argued that considering these  
7 programme evaluation elements may add to strength of a study. Additionally, programme  
8 evaluation often gets neglected, with attention being narrowly focused on programme  
9 development and implementation (26). This protocol aims to avoid these common pitfalls  
10 and limitations and presents an evaluation framework which integrates these elements.

11 Research suggests that instead of focusing on the development of a standardised appraisal  
12 tool for quality measurement, evaluation should be guided by the purpose (27). This  
13 research aims to retrospectively understand which curricular, training, and contextual factors  
14 inhibit or enable the effectiveness, sustainability and spread of the measurement for  
15 improvement training using a customised framework. Medical educators can select from  
16 various individual programme evaluation models or use a combination to develop a  
17 framework appropriate to answer their evaluation questions (28). This research draws on  
18 two evaluation models to develop a tool suitable for this case study: The Kirkpatrick  
19 Evaluation Model (29) and MUSIQ (30). The following sections describe the selected  
20 evaluation models and provide justification for their use.

### 21 **Kirkpatrick evaluation model**

22 Kirkpatrick's model measures the impact of training at four levels; reaction of participants,  
23 participant learning, change in behaviour and impact on the organisational results (29). The  
24 model employs straightforward evaluation criteria and requires measurement of a limited  
25 number of variables (31). The popularity of this model is attributed to its simplicity in outlining  
26 a system for training outcome assessment and simplifying the complex evaluation process;

1  
2  
3 1 however, it is also criticised for being incomplete (32). The understanding about factors  
4  
5 2 which impact training effectiveness has grown over the years revealing that contextual  
6  
7 3 factors, individual characteristics, and training design elements play a critical role in training  
8  
9 4 success. However, the Kirkpatrick model does not account for these factors (32).

11  
12 5 The model's underlying assumptions are also a source of criticism as it assumes that each  
13  
14 6 succeeding level provides more information than the previous one, each level is causally  
15  
16 7 linked to the other and the correlation between the levels is positive (33). It is independent of  
17  
18 8 the learner's previous experience or learning, individual factors and other environmental and  
19  
20 9 contextual factors that can impact training success (31). The Kirkpatrick Model is outcome  
21  
22 10 focused and a drawback of such models is that although they provide a good understanding  
23  
24 11 of what was achieved, they offer little evidence about the process through which these  
25  
26 12 outputs were achieved and the related barriers and enablers. This emphasises the need to  
27  
28 13 go beyond the outcomes-focused Kirkpatrick model to understand how the programme  
29  
30 14 works (34). Some areas of improvement identified by previous studies in the Kirkpatrick  
31  
32 15 Model include paying more attention to the teaching and learning methods (31) and utilising  
33  
34 16 all four levels of the model over a longer period, and mechanisms for exploring possible  
35  
36 17 causal links among the four levels (35).

37  
38  
39  
40 18 Despite the criticism, the Kirkpatrick model has remained a popular choice for evaluating  
41  
42 19 learner outcomes in training programmes (28) and has been used to evaluate higher  
43  
44 20 education programmes, methodology workshops, professional development programmes  
45  
46 21 and short duration courses (36). This research will rely on the four levels presented by the  
47  
48 22 model but will adapt it to purpose of this research and account for these criticisms through  
49  
50 23 integrating the MUSIQ alongside the Kirkpatrick Model in a unified evaluation framework.

#### 51 52 53 24 **Model for understanding success in quality (MUSIQ)**

54  
55  
56 25 Context can be defined as the "why" and "when" of change and includes influential factors  
57  
58 26 from the outer setting and internal setting (37). Factors internal to the organisation can  
59  
60



1  
2  
3 1 include organisational size, teams, leadership, culture, and implementation environment  
4  
5 2 while external factors can include regulatory requirements, funding, and professional  
6  
7 3 organisations (38).  
8  
9

10 4 The systematic literature review conducted in the exploratory phase of this research  
11  
12 5 highlighted that success of developing data skills of healthcare professional for QI is not  
13  
14 6 solely dependent on intervention design but also influenced by context (14). Thus, success  
15  
16 7 of a QI intervention can vary across implementation settings (39). Most studies evaluating QI  
17  
18 8 programmes focus on the evaluation of the intervention and only few incorporate methods to  
19  
20 9 assess impact of contextual factors (40). The constructivist-pragmatist research problem  
21  
22 10 being investigated cannot be fully addressed without incorporating context into the  
23  
24 11 evaluation design.  
25  
26

27 12 There is an increased interest in understanding the role of context in QI initiatives and  
28  
29 13 several frameworks and models have been developed to address this (41). One such model  
30  
31 14 is the MUSIQ model. The model acknowledges the system as a product of individual parts  
32  
33 15 and interrelationships. It identifies twenty-five contextual factors and their relative influence  
34  
35 16 at various levels of the healthcare system (30). The model was later revised to expand the  
36  
37 17 number of contextual factors to thirty-six. These new factors include external knowledge  
38  
39 18 (general and project specific), portfolio management, specialist staff, microsystem capacity  
40  
41 19 and patient engagement (30). The factors presented in this model are relevant to this  
42  
43 20 research question and will be incorporated into this evaluation.  
44  
45  
46

47 21 The MUSIQ model is relatively new as it was published in 2012 and has been only used by a  
48  
49 22 handful of studies to date. Therefore, there is insufficient evidence to draw conclusions  
50  
51 23 regarding model usefulness, though studies have confirmed the observation of all original  
52  
53 24 factors in the QI initiatives being studied (42). One reported the framework and underlying  
54  
55 25 assumptions useful for interrogating the research question (43) and another reported that the  
56  
57 26 model was useful in identifying contextual constraints (44). The Kirkpatrick model focuses on  
58  
59 27 different outcome levels while MUSIQ adds another perspective of context at healthcare  
60

1  
2  
3 1 system level. The MUSIQ model offers the missing link to context and relationships in the  
4  
5 2 Kirkpatrick model. The evaluation framework for this research focuses on integrating the two  
6  
7 3 models to address the aim of this research.  
8  
9

#### 10 4 **Integrated evaluation framework**

11  
12

13 5 Knowing what information to collect, whom to collect it from and when to collect are critical  
14  
15 6 decisions in designing a comprehensive evaluation once the purpose of the evaluation has  
16  
17 7 been established (45). The proposed framework presented in Table 1 combines evaluation  
18  
19 8 perspectives from the two models and will be used to guide data collection through semi-  
20  
21 9 structured qualitative interviews and document analysis. A draft interview guide for  
22  
23 10 collaborative trainees based on the evaluation framework can be found in supplemental file  
24  
25 11 1.  
26  
27  
28  
29  
30  
31  
32  
33  
34  
35  
36  
37  
38  
39  
40  
41  
42  
43  
44  
45  
46  
47  
48  
49  
50  
51  
52  
53  
54  
55  
56  
57  
58  
59  
60

1 **Table 1:**2 **Title: Integrated evaluation framework**

| Model Components        | Definitions                   |                                                                                                                   |
|-------------------------|-------------------------------|-------------------------------------------------------------------------------------------------------------------|
| External environment    | External motivators           | External factors that stimulate the organisation to focus on the QI project                                       |
|                         | Project sponsorship           | External entities contributing personnel, expertise, equipment, facilities, or other resources for project        |
| Organisation            | QI leadership                 | Senior leadership commitment to champion and support QI project                                                   |
|                         | Senior leader project sponsor |                                                                                                                   |
|                         | Culture supportive of QI      | Values, beliefs, and norms of an organisation that shape the behaviours of staff in pursuing QI                   |
|                         | Maturity of organisational QI | Sophistication of the organisation's QI programmes                                                                |
|                         | Staff engagement              | Steps taken by the organisation for continued staff engagement in QI                                              |
| QI support and capacity | Data infrastructure           | Extent to which a system exists to collect, manage, and facilitate the use of data<br>Effective use of technology |
|                         | Resource availability         | Support for QI, including allocation of resources, finances, and staff time                                       |
|                         | Workforce focus on QI         | Workforce development through training and engagement in QI                                                       |
| QI team and Microsystem | Team diversity                | Diversity of team members with respect to professional discipline, personality, motivation, and perspective       |
|                         | Physician involvement         | Contribution of physicians to the QI team efforts                                                                 |
|                         | Subject matter expert         | Team member/members knowledgeable about measurement                                                               |
|                         | Prior QI experience           | Prior experience with QI                                                                                          |

|                                   |                                                                                 |                                                                                                                            |
|-----------------------------------|---------------------------------------------------------------------------------|----------------------------------------------------------------------------------------------------------------------------|
|                                   | Team leadership                                                                 | Team leader's ability to accomplish the goals of the improvement project by guiding the QI team                            |
|                                   | Team norms                                                                      | Team establishes strong norms of behaviour about QI goal achievement                                                       |
|                                   | Team QI skill/capability for improvement                                        | Team's ability to use improvement methods to make changes                                                                  |
|                                   | Motivation to change                                                            | Extent to which team members have a desire and willingness to improve                                                      |
|                                   | QI Accountability                                                               | Clearly stated and communicated responsibility and accountability in the project                                           |
| Trigger (Training Event)          | Participation and Reaction (Kirkpatrick Level 1)                                | Overall satisfaction with the programme, content, delivery, logistics, facilitators etc                                    |
|                                   | Knowledge, Skills and Attitudes (Kirkpatrick Level 2)                           | Improvement in knowledge and skills reported by participants immediately after the intervention                            |
| Outcomes/process & system changes | Behaviour Change (Kirkpatrick Level 3)                                          | Confidence in measurement skills<br>Maintaining and advancing the skills learned<br>Continued Spread and involvement in QI |
|                                   | Learning Networks                                                               | Development of QI networks among post-intervention                                                                         |
|                                   | QI Capacity development                                                         | Ability of participants to initiate and lead other projects<br>Ability of participants to train/help other staff           |
|                                   | Change in Organisational Practice and/or Patient Outcomes (Kirkpatrick Level 4) | Sustainability in outcomes achieved<br>Sustainability in practices<br>Process changes as a result of the training event    |
|                                   | Dissemination/spread                                                            | Spread of knowledge and improved practices to non-intervention units                                                       |
|                                   | Unintended consequences                                                         | Negative or positive, unanticipated outcomes                                                                               |

1

## 1 **Case design**

2 This research study will use a multiple case design (24). A multiple case design is suited for  
3 this study because measurement for improvement training occurs at a common venue where  
4 it is attended by healthcare staff from diverse backgrounds and multiple organisations.  
5 Participants then return to their own organisations to apply their learning. In Ireland, the  
6 National QI Team within the Health Service Executive (HSE) is responsible for partnering  
7 with health and social care services to promote sustainable QI. The Measurement for  
8 Improvement (MFI) curriculum (6) is one such effort to train staff in handling quantitative and  
9 qualitative data for QI. The curriculum identifies and outlines essential components of high-  
10 quality Measurement for Improvement (MFI) training to ensure a consistent standard of  
11 training for the Irish Healthcare staff (6). The purpose of this research is to apply the  
12 integrated framework to evaluate the measurement for improvement curriculum.

## 13 **Case selection**

14 The bounded systems are the training collaboratives in which the training was imparted. The  
15 trainees belonged to different organisations who came together for the training and then  
16 implemented the skills in their own organisational contexts. This research design therefore  
17 consists of two cases; the Pressure Ulcers to Zero collaborative (PUTZ) and Clinical  
18 Microsystems collaborative, which delivered measurement for improvement training. The  
19 PUTZ collaborative took place between 2016 and 2018. The aim of the collaborative was to  
20 reduce ward acquired pressure ulcers by 50% in participating teams within six months and  
21 sustain the achieved results at twelve months (46). The micro-systems collaborative  
22 occurred in 2017 and its aim was to improve the quality of patient care and work life of the  
23 emergency departments' staff participating in the collaborative (47). Both collaboratives  
24 consisted of 3 training days and activity periods in between, with measurement for  
25 improvement being an important component of the training content.

26

### 1 **Researcher reflexivity statement**

2 The lead researcher immersed herself in the work of the National QI Team of the Health  
3 Service Executive (HSE) Ireland to develop a deeper understanding of their work,  
4 understand the context for measurement for improvement and the aims and objectives of the  
5 training programmes. This immersion and ethnographic observation provided invaluable  
6 opportunity to the researcher to observe and work on various other projects of the National  
7 QI Team. The researcher, therefore, developed an insider perspective about the operations  
8 and culture of the health system, something which facilitated a better understanding when  
9 participants described aspects of the system such as bureaucracy. However, one possible  
10 drawback of this could be a preference for 'trainer' views due to the researcher's familiarity  
11 with these individuals. To counter this, the researcher will structure the analysis into trainer  
12 and trainee perspectives so that both perspectives are included in a balanced analysis. As  
13 an additional quality step, the emerging findings will be presented to the research team to  
14 challenge assumptions and increase trustworthiness.

### 15 **Patient and public involvement statement**

16 No patient involved

### 17 **Data collection**

18 Data collection will be conducted using multiple sources of evidence through semi-structured  
19 interviews with training participants, trainers and site coordinators and document analysis. A  
20 case study database in the form of electronic files will be maintained for this case study  
21 research. The database will have two main sections; the evidence or data collected and  
22 reports of the investigators (24).

23 The study population will include healthcare staff who were trained, those who delivered  
24 training, site coordinators of participating sites, leads of the two collaboratives in the HSE.

25 The trainee population ranges from senior-level staff such as Assistant Directors of Nursing  
26 to frontline staff such as healthcare assistants and nurses. This research will use a

1  
2  
3 1 purposive sampling strategy by including participants who shared the common experience of  
4  
5 2 the training and had participated in the two collaboratives (48). This is purposely kept broad  
6  
7 3 as both collaboratives were completed more than two years ago as the researchers  
8  
9 4 anticipate challenges in recruiting participants. Participation in the study will be on a  
10  
11 5 voluntary basis and the researcher will describe the nature of the study in detail to the  
12  
13 6 participants and answer all questions prior to any data collection. The National QI Team will  
14  
15 7 serve as a gatekeeper for participant recruitment for trainees and send a letter to introduce  
16  
17 8 the researcher to participants The recruitment letter is available in Supplemental File 2.  
18  
19 9 Those willing to participate would then contact the researcher and written informed consent  
20  
21 10 will be obtained. The study consent form is available in Supplemental File 3.  
22  
23  
24  
25 11 The data collection will be conducted via semi-structured interviews and document analysis.  
26  
27 12 The semi-structured interviews will be conducted by the lead author. The interview method  
28  
29 13 will allow the researcher to capture the words, thoughts, feelings, perceptions, and  
30  
31 14 experiences of the participants to answer the research question (49). The first two interviews  
32  
33 15 will be used as a pilot to review the interview guide and make changes if required. The  
34  
35 16 collected documents will be used to inform participant reaction and learning (Kirkpatrick  
36  
37 17 levels 1 and 2). These documents will include (depending on the availability) the end of  
38  
39 18 collaborative reports and any feedback forms used during the collaboratives. Level 3 and 4  
40  
41 19 data along with contextual factors (from MUSIQ framework) will be collected through  
42  
43 20 interviews. This research aims to recruit all trainers, both leads of the two collaboratives in  
44  
45 21 the HSE, and 10 participants from each collaborative.  
46  
47  
48

## 49 **Data processing**

50  
51 23 The interviews will be audio recorded and transcribed and anonymised. Site pseudonyms  
52  
53 24 will be used. A field journal will be maintained by the researcher while interviewing which will  
54  
55 25 be used to make a note of researcher's assumptions, feelings and biases and reflections on  
56  
57 26 the interviews. After each interview, the recording will be analysed to improve the  
58  
59  
60

1  
2  
3 1 researcher's performance as an interviewer. A case database will be maintained to store all  
4  
5 2 collected data.  
6  
7

### 8 3 **Data analysis**

9

10 4 The data analysis of case studies involves a detailed description of the setting or individuals  
11  
12 5 and analysis of the data for themes or issues (50). A detailed description of the training  
13  
14 6 programme, sites and participants will be followed by a thematic analysis of the qualitative  
15  
16 7 interview data and the documents collected. The coding and analysis framework is  
17  
18 8 presented in Figure 2 (51). Coding process will be aided by the NVivo12 software which  
19  
20 9 provides a platform for data management, querying and visualisation (52).  
21  
22  
23

24 10 This qualitative analysis will rely on the same theoretical and analytical strategy to study both  
25  
26 11 cases and then the patterns found in each case will be compared (24). The comparison  
27  
28 12 between the two cases will be performed. The involves analysing the data in new ways,  
29  
30 13 explore relationships and the cluster the data so contrasts, and similarities emerge (53).  
31  
32

### 33 14 **Ensuring rigour**

34  
35

36 15 Rigour will be ensured by triangulating through multiple sources of data by including  
37  
38 16 perspectives of multiple stakeholders and multiple data collection methods. Data collection  
39  
40 17 and analysis methods and researcher reflexivity will be clearly documented to ensure  
41  
42 18 transparency. At the analysis stage, two other researchers will review codes collectively in  
43  
44 19 regular meetings (54). The researchers aim to perform member checking by contacting 10%  
45  
46 20 of the participants and sharing a summary of results. The researchers also aim to perform  
47  
48 21 member checking with a broader audience through an interactive webinar. The HSE  
49  
50 22 regularly conducts QI webinars, and this platform would be useful for reaching healthcare  
51  
52 23 professionals interested in QI and enable the researchers to obtain and incorporate  
53  
54 24 feedback from a wider audience into the results. The other method of dissemination would  
55  
56 25 be through peer-reviewed journal articles which would also strengthen the study. To  
57  
58 26 incorporate the impact of the COVID-19 pandemic on this research process and the work  
59  
60



1  
2  
3 1 practices of healthcare staff, questions to explore the role of QI education and measurement  
4  
5 2 for improvement in adapting to new ways of working are included in the interview topic  
6  
7 3 guide.  
8  
9

#### 10 4 **DISCUSSION**

11  
12  
13 5 Data and measurement can be used to monitor and support improvement and to enhance  
14  
15 6 the quality of care, making measurement for improvement an essential skill for the  
16  
17 7 healthcare staff (55). This research aims to explore training, curricular and contextual factors  
18  
19 8 that can help in the development and use of measurement for improvement skills in  
20  
21 9 healthcare staff. To our knowledge, no previous studies have evaluated measurement for  
22  
23 10 improvement programmes. Additionally, many QI programmes are not appropriately  
24  
25 11 evaluated, peer-reviewed or published (56) therefore it is difficult to access any work on  
26  
27 12 measurement for improvement skills that may have been conducted before.  
28  
29

30 13 Theoretically, this research will contribute towards the current understanding of the two  
31  
32 14 models. It will add to the evidence base of MUSIQ model and confirm the existence or non-  
33  
34 15 existence of the contextual factors and relationships presented in the model. The study uses  
35  
36 16 MUSIQ model in a qualitative design while majority of the previous studies have relied on  
37  
38 17 quantitative approaches. It will study all four levels proposed in the Kirkpatrick model which  
39  
40 18 is less common in previous studies. The integrated framework is a theoretical contribution to  
41  
42 19 the field and the analysis will also reflect on the useful and effectiveness of the approach.  
43  
44

45  
46 20 Although qualitative research may not be generalisable, this research will be one of the few  
47  
48 21 studies focusing on measurement for improvement and will reveal a multitude of avenues for  
49  
50 22 future research. The results will not only be of importance for QI/measurement training  
51  
52 23 design, but also for evaluation purposes and for healthcare organisations and systems.  
53

54 24 There is a need for further research in the evaluation of QI programmes in terms of their  
55  
56 25 immediate and long-term impacts. Measurement for improvement is an important but less  
57  
58 26 explored topic in programme evaluations and there is need to expand the understanding of  
59  
60

1  
2  
3 1 what to teach, how to teach and how to evaluate programmes that aim to train healthcare  
4  
5 2 staff in quantitative and qualitative data skills. Programme evaluation should be viewed as a  
6  
7 3 driving force for future programme design and policy. Instead of focusing on using  
8  
9 4 standardised models, this study takes a customised evaluation approach, appropriate to  
10  
11 5 answer this research question which is a theoretical contribution to the field. This approach  
12  
13 6 is expected to expand the empirical and theoretical understanding of factors that influence  
14  
15 7 the development and use of measurement for improvement skills in healthcare staff. Another  
16  
17 8 expected impact of this research will be to deepen the understanding of contextual factors  
18  
19 9 that impacted programme success at various levels of the healthcare system.  
20  
21  
22

## 23 10 **ETHICS AND DISSEMINATION**

24  
25 11 The study has received exemption from full ethical review from the Human research ethics  
26  
27 12 committee of our institution (LS-E-19-108). The results of the study will be disseminated in  
28  
29 13 peer reviewed Journals.  
30  
31

## 32 14 **AUTHORS' CONTRIBUTIONS**

33  
34  
35 15 ZK developed the methodology and prepared the initial draft in consultation with ADB and  
36  
37 16 EM. ADB and EM provided substantive feedback on the draft which was revised by ZK. All  
38  
39 17 authors have read and approved the final manuscript.  
40  
41

## 42 18 **COMPETING INTERESTS**

43  
44  
45 19 The authors have no competing interests to declare.  
46  
47

## 48 20 **FUNDING STATEMENT**

49  
50  
51 21 The corresponding author (ZK) is receiving a PhD funding from the Health Service Executive  
52  
53 22 Ireland (Project reference 57399). The study is also supported by the Irish Health Research  
54  
55 23 Board (RL-2015-1588). The funding sources had no influence on the design of this study,  
56  
57 24 analyses, interpretation of the data, or decision to publish results.  
58  
59  
60

## 1 REFERENCES

- 2 1. Mosadeghrad AM. A conceptual framework for quality of care. *Mater Sociomed*  
3 2012;24(4):251-61. doi: 10.5455/msm.2012.24.251-261 [published Online First: 2012/01/01]
- 4 2. Allen-Duck A, Robinson JC, Stewart MW. Healthcare Quality: A Concept Analysis. *Nurs*  
5 *Forum* 2017;52(4):377-86. doi: 10.1111/nuf.12207 [published Online First: 2017/04/14]
- 6 3. Donabedian A. The Definition of Quality and Approaches to Its Assessment. Vol 1.  
7 Explorations in Quality Assessment and Monitoring. Ann Arbor, Michigan, USA: Health  
8 Administration Press 1980
- 9 4. The Health Foundation. Quality improvement made simple: What everyone should know  
10 about health care quality improvement, 2013
- 11 5. World Health Organisation. Operations manual for staff at primary health care centres.  
12 Geneva Switzerland, 2008.
- 13 6. Quality Improvement Division. Measurement for Improvement Curriculum. Dublin, Ireland:  
14 Health Service Executive, 2017
- 15 7. Smith F, Alexandersson P, Bergman B, et al. Fourteen years of quality improvement  
16 education in healthcare: a utilisation-focused evaluation using concept mapping. *BMJ Open*  
17 *Quality* 2019;8(4):e000795. doi: 10.1136/bmjopen-2019-000795
- 18 8. O'Leary KJ, Fant AL, Thurk J, et al. Immediate and long-term effects of a team-based  
19 quality improvement training programme. *BMJ Quality & Safety* 2019;28(5):366-73. doi:  
20 10.1136/bmjqs-2018-007894
- 21 9. Sitzmann T, Weinhardt JM. Training Engagement Theory: A Multilevel Perspective on the  
22 Effectiveness of Work-Related Training. *Journal of Management* 2018;44(2):732-56. doi:  
23 10.1177/0149206315574596.

10. Bates P, Mendel P, Robert G. Organizing for quality: the improvement journeys of leading hospitals in Europe and the United States: Abingdon, UK: Radcliffe Publishing, 2008
11. Silver SA, McQuillan R, Harel Z, et al. How to Sustain Change and Support Continuous Quality Improvement. *Clinical journal of American Society of Nephrology* 2016; 11:916–24.
12. The Health Foundation. Quality improvement training for healthcare professionals. Evidence Scan. United Kingdom: The Health Foundation, 2012
13. Varkey P, Reller MK, Resar RK. Basics of quality improvement in health care. *Mayo Clin Proc. England*, 2007:735-9
14. Khurshid Z, De Brún A, Martin J, et al. A Systematic Review and Narrative Synthesis: Determinants of the Effectiveness and Sustainability of Measurement-Focused Quality Improvement Trainings. *Journal of Continuing Education in the Health Professions* 2021; doi: 10.1097/CEH.0000000000000331
15. Austin JM, Kachalia A. The State of Health Care Quality Measurement in the Era of COVID-19: The Importance of Doing Better. *Jama* 2020;324(4):333-34. doi: 10.1001/jama.2020.11461
16. Dixon-Woods M, McNicol S, Martin G. Ten challenges in improving quality in healthcare: lessons from the Health Foundation's programme evaluations and relevant literature. *BMJ Quality & Safety* 2012;21(10):876-84. doi: 10.1136/bmjqs-2011-000760
17. Crotty M. *The Foundations of Social Research: Meaning and Perspective in the Research Process*. Thousands Oaks California: Sage Publications 1998
18. Christ TW. The worldview matrix as a strategy when designing mixed methods research. *International Journal of Multiple Research Approaches* 2013;7(1):110-18. doi: 10.5172/mra.2013.7.1.110
19. Saunders M, Lewis P, Thornhill A. *Research methods for business students*. Seventh ed. Harlow: Pearson Education Limited 2016

- 1 20. Merriam SB. Qualitative research and case study applications in education. In: Merriam  
2 SB, ed. 2nd ed. ed. San Francisco: Jossey-Bass Publishers, 1998
- 3 21. Anderson C. Presenting and evaluating qualitative research. American journal of  
4 pharmaceutical education 2010;74(8):141-41. doi: 10.5688/aj7408141
- 5 22. Simons H. Case study research in practice. London;Los Angeles;: SAGE 2009
- 6 23. Luck L, Jackson D, Usher K. Case study: a bridge across the paradigms. Nursing Inquiry  
7 2006;13(2):103-09. doi: 10.1111/j.1440-1800.2006.00309.x
- 8 24. Yin RK. Case Study Research: Design and Methods. Third ed: SAGE Publications 2003
- 9 25. Marguerite F. Evaluation of training and development programs: A review of the  
10 literature. Australasian Journal of Educational Technology 1989;5(2) doi: 10.14742/ajet.2340
- 11 26. Cook DA. Twelve tips for evaluating educational programs. Medical Teacher  
12 2010;32(4):296-301. doi: 10.3109/01421590903480121
- 13 27. Yardley S, Dornan T. Kirkpatrick's levels and education 'evidence'. Med Educ  
14 2012;46(1):97-106. doi: 10.1111/j.1365-2923.2011.04076.x [published Online First:  
15 2011/12/14]
- 16 28. Frye AW, Hemmer PA. Program evaluation models and related theories: AMEE guide  
17 no. 67. Med Teach 2012;34(5):e288-99. doi: 10.3109/0142159x.2012.668637 [published  
18 Online First: 2012/04/21]
- 19 29. Kirkpatrick DL. Techniques for Evaluation Training Programs. Journal of the American  
20 Society of Training Directors 1959;13:21-26
- 21 30. Kaplan HC, Provost LP, Froehle CM, et al. The Model for Understanding Success in  
22 Quality (MUSIQ): building a theory of context in healthcare quality improvement. BMJ Quality  
23 & Safety 2012;21(1):13-20. doi: 10.1136/bmjqs-2011-000010

- 1  
2  
3 1 31. Heydari MR, Taghva F, Amini M, et al. Using Kirkpatrick's model to measure the effect of  
4 a new teaching and learning methods workshop for health care staff. BMC Research Notes  
5 2019;12(1):388. doi: 10.1186/s13104-019-4421-y  
6  
7  
8  
9  
10 4 32. Bates R. A critical analysis of evaluation practice: the Kirkpatrick model and the principle  
11 of beneficence. Evaluation and Program Planning 2004;27(3):341-47. doi:  
12 <https://doi.org/10.1016/j.evalprogplan.2004.04.011>  
13  
14  
15  
16  
17 7 33. Alliger GM, Janak EA. Kirkpatrick's levels of training criteria: thirty years later. Personnel  
18 Psychology 1989;42(2):331-42. doi: 10.1111/j.1744-6570.1989.tb00661.x  
19  
20  
21  
22 9 34. Parker K, Burrows G, Nash H, et al. Going beyond Kirkpatrick in evaluating a clinician  
23 scientist program: it's not "if it works" but "how it works". Acad Med 2011;86(11):1389-96.  
24 doi: 10.1097/ACM.0b013e31823053f3 [published Online First: 2011/09/29]  
25  
26  
27  
28  
29 12 35. Reio TG, Rocco TS, Smith DH, et al. A Critique of Kirkpatrick's Evaluation Model. New  
30 Horizons in Adult Education and Human Resource Development 2017;29(2):35-53. doi:  
31 <https://doi.org/10.1002/nha3.20178>  
32  
33  
34  
35  
36 15 36. Moldovan L. Training Outcome Evaluation Model. Procedia Technology 2016;22:1184-  
37 90. doi: <https://doi.org/10.1016/j.protcy.2016.01.166>  
38  
39  
40  
41 17 37. Pettigrew A, Ferlie E, McKee L. Shaping strategic change - The case of the NHS in the  
42 1980s. Public Money & Management 1992;12(3):27-31. doi: 10.1080/09540969209387719  
43  
44  
45  
46 19 38. Wiig S, Aase K, Johannessen T, et al. How to deal with context? A context-mapping tool  
47 for quality and safety in nursing homes and homecare (SAFE-LEAD Context). BMC  
48 Research Notes 2019;12(1):259. doi: 10.1186/s13104-019-4291-3  
49  
50  
51  
52  
53 22 39. Hovlid E, Bukve O. A qualitative study of contextual factors' impact on measures to  
54 reduce surgery cancellations. BMC Health Services Research 2014;14(1):215. doi:  
55 [10.1186/1472-6963-14-215](https://doi.org/10.1186/1472-6963-14-215)  
56  
57  
58  
59  
60

- 1  
2  
3 1 40. Øvretveit JC, Shekelle PG, Dy SM, et al. How does context affect interventions to  
4  
5 2 improve patient safety? An assessment of evidence from studies of five patient safety  
6  
7 3 practices and proposals for research. *BMJ Quality & Safety* 2011;20(7):604-10. doi:  
8  
9 4 10.1136/bmjqs.2010.047035  
10  
11  
12 5 41. Coles E, Wells M, Maxwell M, et al. The influence of contextual factors on healthcare  
13  
14 6 quality improvement initiatives: what works, for whom and in what setting? Protocol for a  
15  
16 7 realist review. *Systematic Reviews* 2017;6(1):168. doi: 10.1186/s13643-017-0566-8  
17  
18  
19 8 42. Reed JE, Kaplan HC, Ismail SA. A new typology for understanding context: qualitative  
20  
21 9 exploration of the model for understanding success in quality (MUSIQ). *BMC Health Serv*  
22  
23 10 *Res* 2018;18(1):584. doi: 10.1186/s12913-018-3348-7 [published Online First: 2018/07/27]  
24  
25  
26 11 43. Griffin A, McKeown A, Viney R, et al. Revalidation and quality assurance: the application  
27  
28 12 of the MUSIQ framework in independent verification visits to healthcare organisations. *BMJ*  
29  
30 13 *Open* 2017;7(2):e014121. doi: 10.1136/bmjopen-2016-014121 [published Online First:  
31  
32 14 2017/02/16]  
33  
34  
35 15 44. Eboime EA, Nxumalo N, Ramaswamy R, et al. Strengthening decentralized primary  
36  
37 16 healthcare planning in Nigeria using a quality improvement model: how contexts and actors  
38  
39 17 affect implementation. *Health Policy Plan* 2018;33(6):715-28. doi: 10.1093/heapol/czy042  
40  
41 18 [published Online First: 2018/05/10]  
42  
43  
44 19 45. Dahiya S, Jha A. Review of training evaluation. *International Journal of Computer*  
45  
46 20 *Science and Communication* 2011;2(1):11– 16.  
47  
48  
49 21 46. Murphy L, Browne M, Branagan O, et al. Final Report: Pressure Ulcers to Zero  
50  
51 22 Collaborative: Health Service Executive, Ireland, 2018.  
52  
53  
54 23 47. Toland L, Naddy B, Crowley P. Clinical Microsystems in the Emergency Department.  
55  
56 24 *International Journal of Integrated Care* 2017;17:547. doi: 10.5334/ijic.3867  
57  
58  
59  
60

- 1  
2  
3 1 48. Newell R, Burnard P. Research for evidence-based practice in healthcare. Chichester:  
4  
5 2 Wiley-Blackwell 2011.  
6  
7  
8 3 49. Holloway I. Qualitative Research In Health Care: Open University Press 2005.  
9  
10  
11 4 50. Stake R. The art of case study research. Thousand Oaks, California: Sage Publications  
12  
13 5 1995.  
14  
15 6 51. Saldana J. The coding manual for qualitative researchers. 3rd ed. Los Angeles: SAGE  
16  
17 7 2015.  
18  
19  
20 8 52. NVivo qualitative data analysis software [program]. Version 12 version, 2018.  
21  
22  
23 9 53. Miles MB, Huberman M. Qualitative data analysis: an expanded source-book. Second  
24  
25 10 ed. Thousand Oaks California: Sage Publications 1994:338.  
26  
27  
28 11 54. Mays N, Pope C. Assessing quality in qualitative research. BMJ 2000;320(7226):50-52.  
29  
30 12 doi: 10.1136/bmj.320.7226.50  
31  
32  
33 13 55. Shah A. Using data for improvement. BMJ 2019;364:l189. doi: 10.1136/bmj.l189  
34  
35  
36 14 56. Jones EL, Dixon-Woods M, Martin GP. Why is reporting quality improvement so hard? A  
37  
38 15 qualitative study in perioperative care. BMJ Open 2019;9(7):e030269. doi: 10.1136/bmjopen-  
39  
40 16 2019-030269  
41  
42  
43 17  
44  
45 18  
46  
47  
48 19  
49  
50  
51 20  
52  
53  
54 21  
55  
56  
57 22  
58  
59 23  
60



1  
2  
3 **FIGURE TITLES AND LEGENDS**  
4

5  
6 **FIGURE 1**  
7

8 **Title:** Research design choices through an adaptation of Saunders' research onion  
9

10  
11 **Legend:** Flow chart of Research design choices for the study through an adaptation of  
12  
13  
14 Saunders' research onion  
15

16 **FIGURE 2**  
17

18  
19 **Title:** Coding and Analysis Framework  
20

21  
22 **Legend:** Description of coding and analysis steps adapted from Johnny Saldana's coding  
23  
24 methodology  
25

26  
27  
28  
29  
30  
31  
32  
33  
34  
35  
36  
37  
38  
39  
40  
41  
42  
43  
44  
45  
46  
47  
48  
49  
50  
51  
52  
53  
54  
55  
56  
57  
58  
59  
60

For peer review only

1  
2  
3  
4  
5  
6  
7  
8  
9  
10  
11  
12  
13  
14  
15  
16  
17  
18  
19  
20  
21  
22  
23  
24  
25  
26  
27  
28  
29  
30  
31  
32  
33  
34  
35  
36  
37  
38  
39  
40  
41  
42  
43  
44  
45  
46  
47  
48  
49  
50  
51  
52  
53  
54  
55  
56  
57  
58  
59  
60

**Figure 1**



Figure 2

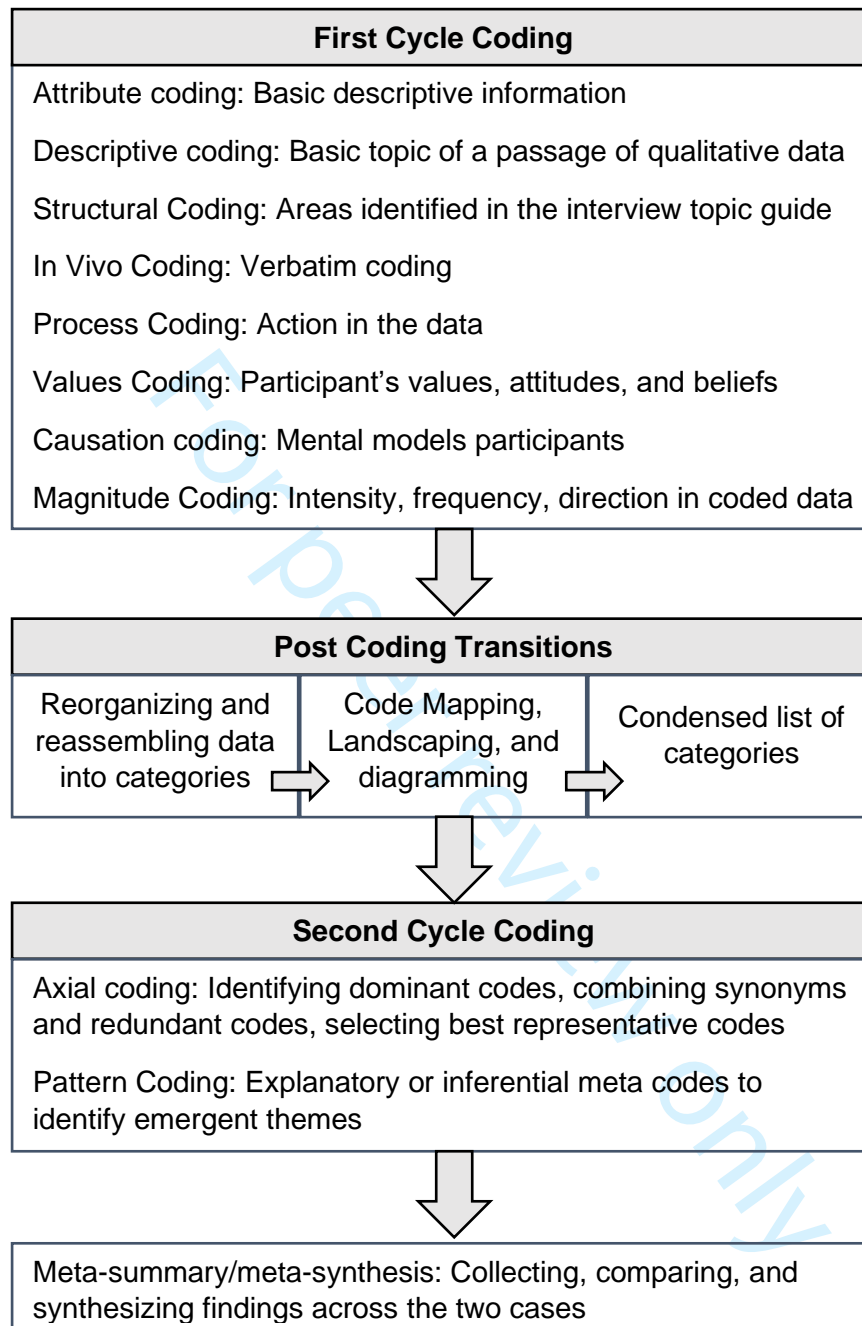

## Supplemental File 1: Sample interview topic guide for collaborative trainees

### Introduction

- What is your professional background and what is your current job role?
- How did you become a part of the PUTZ/microsystems collaborative?
- What were your expectations regarding learning measurement for improvement/QI during the training?
- Did you have any knowledge of or experience in using measurement/QI techniques prior to the collaborative?

### Effectiveness

- Looking back, how would you assess the suitability of the collaborative for your needs?
  - PROBES
  - Session content
  - Session format/logistics
  - Coaching and support
- If you can recall, which concepts were easier to understand for the team and which areas you struggled with?
- Did you find the measurement techniques to be useful to your work?
- What factors could have made the training more effective and usable for you?
- What challenges/barriers did you face while implementation?

### Sustainability

- Do you think you have been able to retain the skills 2 years after the collaborative?
  - PROBES
  - Retention as a team
- Do you still use some or all the skills in your work? Could you give some examples?
- Do you think the training gave you an advantage over staff who did not attend the training?
- What motivated you to sustain this knowledge?
- What factors facilitated sustaining these skills in the long term?

- PROBES
- Support from senior and frontline managers
- Data Infrastructure within organization
- Resource availability
- External and Internal motivating factors
- Team capacity
- Would you like to remain involved in work that requires the use of these skills?
- Would you like to enhance your measurement/QI skills further?

### **Spread**

- Have you shared your knowledge with colleagues in your own team and department? If yes, what means (formal or informal) used to spread this knowledge?
- Would you say all members of the team, regardless of their participation in the training, feel comfortable applying these skills?
- Have you shared your knowledge with those outside the team, department, or organization?
- What motivates you to share knowledge with others?
- Would you know others, within the organization or outside, who are experts in measurement and QI methods, and do you consult them if there is a need?
- What were the challenges in spreading knowledge?
- What were the enablers in spreading knowledge?
  - PROBES
  - Role of leaders
  - Supportive culture of the organization
  - Availability of resources

### **COVID-19**

- Have there been any changes in the way you or your teamwork during the pandemic?
  - PROBE
  - Organizational level changes

- Did your QI and measurement skills help you in changing and adapting to the new clinical pathways? Did you use any QI or measurement skills, approaches or tools during this time?
- What support in QI methods and knowledge could have made this transition easier for you?
- For the foreseeable future it is likely that training will be delivered virtually - what would be your opinion on distance learning for QI and measurement skills
- Is there anything else you would like to add that could help improve the training?

## Supplemental File 2: Recruitment letter

Dear Colleague,

This letter is to introduce Zuneera Khurshid, a PhD student enrolled at University College Dublin (UCD) supervised by Professor Eilish McAuliffe, engaged by the National Quality Improvement Team (NQIT) to conduct research on the effectiveness and sustainability of Measurement for Improvement training and curriculum.

Zuneera's research aims to conduct a case study to assess the effectiveness and sustainability of Measurement for Improvement curriculum and training intervention at micro, meso and macro levels in healthcare staff. It intends to answer questions including:

- Identifying the essential components of successful measurement for improvement training.
- Identifying characteristics and experiences of learners which aid in successful acquisition, retention and application of measurement knowledge.
- Investigate the organizational and contextual factors that impede or facilitate the uptake and spread of measurement for improvement training

This letter is directed towards staff who have participated in the measurement for improvement training interventions. The researcher requests your time and patience to participate in interviews to help explore this research question. The researcher wants to inform you that:

- Participation in the research is voluntary and anonymous.
- If you are interested in participating in the research, you will be contacted by the researcher to explain the study and answer questions (if any).
- You will be provided with information sheets and consent forms before interviews.
- The interview will require approximately 40 minutes and the time and venue will be decided based on the convenience of the participant.
- The researcher intends to publish a research article based on the evaluation, but it will not disclose names or identities of participants.
- You may decline to answer any question, and you may withdraw from the interview at any time

Your participation will help the researcher to develop recommendations for the revision of the curriculum that will make it better suited to the needs of Irish Healthcare staff.

Thank you very much for your time,

The National Quality Improvement Team

1  
2  
3 **Supplemental File 3: Consent forms**  
4

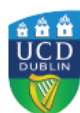

UCD School of Nursing, Midwifery and Health Systems  
UCD College of Health and Agricultural Sciences

10 **PARTICIPANT CONSENT FORM**

11 **Project:** Evaluating the impact of Measurement for  
12 Improvement training

13 **Participant Number:**

14 **Principal Investigator:** Prof Eilish McAuliffe<sup>1</sup>

15  
16  
17 **Researchers:** Ms. Zuneera Khurshid<sup>1</sup>, Dr Aoife De Brun<sup>1</sup>, Dr. Jennifer Martin, Dr. Philip  
18 Crowley<sup>2</sup>

19  
20 **Please tick each**

21  
22  
23  
24  
25  
26  
27  
28  
29  
30  
31  
32  
33  
34  
35  
36  
37  
38  
39  
40

|                                                                                                                                                                                                                                                                                                                                                             |  |
|-------------------------------------------------------------------------------------------------------------------------------------------------------------------------------------------------------------------------------------------------------------------------------------------------------------------------------------------------------------|--|
| I have read the information sheet and understand that I will be involved in this research to explore the impact of measurement for improvement training on work practices.                                                                                                                                                                                  |  |
| I understand that my participation in this study is voluntary and that I am free to withdraw my participation at any time without giving a reason.                                                                                                                                                                                                          |  |
| I understand that I will be taking part in a 40-minute one-on-one interview with a member of the research team, but that this is voluntary, and I can decline to take part if I wish. If I choose to take part, I know I can withdraw at any point up to or during the interview and can receive a copy of my transcript for my review after the interview. |  |
| I understand that all data collected during the study will remain confidential, and I consent to my responses and personal information being stored in a locked filing cabinet and on password protected and encrypted computers located in the School of Nursing, Midwifery and Health Systems, University College Dublin                                  |  |
| I understand that if any disclosures are made that would indicate malpractice or misconduct at any point during the study or suggest that any individual was in danger of harm, this information will be disclosed to the appropriate personnel and the researcher would be obliged to report this to the unit manager at the earliest opportunity.         |  |
| My queries have been addressed to my satisfaction by the research team and I consent to take part in this study.                                                                                                                                                                                                                                            |  |

41  
42  
43 \_\_\_\_\_  
44 **Name of participant**

\_\_\_\_\_

\_\_\_\_\_

45  
46  
47 \_\_\_\_\_  
48 **Name of person taking consent**

\_\_\_\_\_

\_\_\_\_\_

- 49  
50  
51  
52  
53  
54  
55  
56  
57  
58  
59  
60
- |                                                                             |
|-----------------------------------------------------------------------------|
| 1. School of Nursing, Midwifery & Health Systems, University College Dublin |
| 2. National Quality Improvement Team, Health Service Executive              |



# BMJ Open

**Protocol for an integrated evaluation framework to study training, curricular and contextual factors impacting the success of a Measurement for Improvement training programme for healthcare staff in Ireland.**

|                                 |                                                                                                                                                                                                                                                                                           |
|---------------------------------|-------------------------------------------------------------------------------------------------------------------------------------------------------------------------------------------------------------------------------------------------------------------------------------------|
| Journal:                        | <i>BMJ Open</i>                                                                                                                                                                                                                                                                           |
| Manuscript ID                   | bmjopen-2020-047639.R2                                                                                                                                                                                                                                                                    |
| Article Type:                   | Protocol                                                                                                                                                                                                                                                                                  |
| Date Submitted by the Author:   | 19-Jan-2022                                                                                                                                                                                                                                                                               |
| Complete List of Authors:       | Khurshid, Zuneera; University College Dublin, School of Nursing Midwifery and Health Systems<br>De Brún, Aoife; University College Dublin, School of Nursing, Midwifery & Health Systems<br>McAuliffe, Eilish; University College Dublin, School of Nursing, Midwifery and Health Systems |
| <b>Primary Subject Heading</b>: | Health services research                                                                                                                                                                                                                                                                  |
| Secondary Subject Heading:      | Medical education and training, Qualitative research, Research methods                                                                                                                                                                                                                    |
| Keywords:                       | Quality in health care < HEALTH SERVICES ADMINISTRATION & MANAGEMENT, EDUCATION & TRAINING (see Medical Education & Training), QUALITATIVE RESEARCH                                                                                                                                       |
|                                 |                                                                                                                                                                                                                                                                                           |

SCHOLARONE™  
Manuscripts

1  
2  
3 1 **TITLE**  
4  
5

6 2 Protocol for an integrated evaluation framework to study training, curricular and contextual  
7  
8 3 factors impacting the success of a Measurement for Improvement training programme for  
9  
10 4 healthcare staff in Ireland.  
11

12  
13 5 **AUTHORS**  
14

15  
16 6 **CORRESPONDING AUTHOR**  
17

18 7 **Full name:** Dr. Zuneera Khurshid  
19

20  
21 8 **Institutional Address:** Room B111, UCD Centre for Interdisciplinary Research, Education,  
22  
23 9 and Innovation in Health Systems (UCD IRIS) at the School of Nursing, Midwifery and  
24  
25 10 Health Systems, University College Dublin, Dublin, Ireland.  
26

27  
28 11 **e-mail:** zuneera.khurshid@ucdconnect.ie  
29

30  
31 12 **Telephone:** +353 85 8666598  
32

33  
34 13 **Fax number:** NA  
35

36  
37 14 **City:** Dublin  
38

39  
40 15 **Country:** Ireland  
41

42 16 **Postal Address:** Room B111, UCD Centre for Interdisciplinary Research, Education, and  
43  
44 17 Innovation in Health Systems (UCD IRIS) at the School of Nursing, Midwifery and Health  
45  
46 18 Systems, University College Dublin, Dublin, Ireland.  
47

48  
49 19 **CO-AUTHOR-1**  
50

51  
52 20 **Full name:** Dr Aoife De Brún  
53

54 21 **Institutional Address:** UCD Centre for Interdisciplinary Research, Education, and  
55  
56 22 Innovation in Health Systems (UCD IRIS) at the School of Nursing, Midwifery and Health  
57  
58 23 Systems, University College Dublin, Dublin, Ireland  
59  
60

1  
2  
3 24 **City:** Dublin  
4  
5

6 25 **Country:** Ireland  
7

8  
9 26 **email:** aoife.debrun@ucd.ie  
10

11 27 **CO-AUTHOR-2**  
12

13  
14 28 **Full name:** Professor Eilish McAuliffe  
15

16 29 **Institutional Address:** UCD Centre for Interdisciplinary Research, Education, and  
17  
18 30 Innovation in Health Systems (UCD IRIS) at the School of Nursing, Midwifery and Health  
19  
20 31 Systems, University College Dublin, Dublin, Ireland.  
21  
22

23 32 **City:** Dublin  
24

25  
26 33 **Country:** Ireland  
27

28  
29 34 **email:** eilish.mcauliffe@ucd.ie  
30

31 35 **KEYWORDS**  
32

33  
34 36 Quality improvement, QI, programme evaluation, measurement for improvement, qualitative  
35  
36 37 research  
37  
38

39 38 **WORD COUNT**  
40

41  
42 39 3876 (excluding title page, references, figures, and tables)  
43  
44

45 40  
46

47  
48 41  
49

50 42  
51

52  
53 43  
54

55  
56 44  
57

58  
59 45  
60

## 46 **ABSTRACT**

47 **Introduction:** Measurement for improvement is the process of collecting, analysing, and  
48 presenting data to demonstrate whether a change has resulted in an improvement. It is also  
49 important in demonstrating sustainability of improvements through continuous measurement.  
50 This makes measurement for improvement a core element in quality improvement (QI)  
51 efforts. However, there is little to no research investigating factors that influence  
52 measurement for improvement skills in healthcare staff. This protocol paper presents an  
53 integrated evaluation framework to understand the training, curricular and contextual factors  
54 that influence the success of measurement for improvement training by utilising the  
55 experiences of trainees, trainers, programme, and site coordinators.

56 **Methods and analysis:** This research will adopt a qualitative retrospective case-study  
57 design based on constructivist-pragmatic philosophy. The Pressure Ulcers to Zero  
58 collaborative (PUTZ) and Clinical Microsystems collaborative from the Irish health system  
59 which included a measurement for improvement component have been selected for this  
60 study. This paper presents an integrated approach proposing a novel application of two pre-  
61 existing frameworks: The Model for Understanding Success in Quality (MUSIQ) framework  
62 and the Kirkpatrick Evaluation Model to evaluate an unexplored QI context and programme.  
63 A thematic analysis of the qualitative interview data and the documents collected will be  
64 conducted. The thematic analysis is based on a four-step coding framework adapted for this  
65 research study. The coding process will be conducted using NVivo12 software and Microsoft  
66 Excel. A cross-case comparison between the two cases will be performed.

67 **Ethics and dissemination:** The study has received an exemption from full ethical review  
68 from the Human research ethics committee of University College Dublin, Ireland (LS-E-19-  
69 108). Informed consent will be obtained from all participants and the data will be anonymised  
70 and stored securely. The results of the study will be disseminated in peer-reviewed Journals.

## 71 **STRENGTHS AND LIMITATIONS OF THIS STUDY**

- 1  
2  
3 72 • The proposed evaluation framework focuses on the long-term sustainability of  
4  
5 73 measurement for improvement skills in healthcare staff.  
6  
7 74 • The proposed framework is based on the current evidence and models used by  
8  
9 75 various QI studies and accounts for the contextual realities of the healthcare system.  
10  
11 76 • The study addresses current gaps in the methods and application of evaluation  
12  
13 77 frameworks and models in QI evaluation.  
14  
15 78 • The study design is responsive to the current situation and explores the role of  
16  
17 79 Quality Improvement (QI) education and measurement for improvement in adapting  
18  
19 80 to new ways of working during COVID-19.  
20  
21  
22

23 81 The major limitation of this study is recall bias as the training programmes being evaluated  
24  
25 82 were completed more than 2 years ago.  
26  
27

## 28 83 **INTRODUCTION**

29  
30 84 Quality in healthcare is a subjective, complex, and multi-dimensional concept which makes it  
31  
32 85 difficult to define and measure (1). The common defining attributes of healthcare quality in  
33  
34 86 research include the delivery of effective and safe care to attain desired outcomes and a  
35  
36 87 culture of excellence (2). In his pioneering work on healthcare quality, Donabedian described  
37  
38 88 high quality healthcare as the type of care which maximises patient welfare while accounting  
39  
40 89 for the expected gains and losses using legitimate means (3). Since then, the understanding  
41  
42 90 of quality has greatly evolved. The Health Foundation defines healthcare quality as the  
43  
44 91 ability of healthcare services to deliver the desired health outcomes consistent with recent  
45  
46 92 professional knowledge, to individuals and populations (4). Similarly, there are various  
47  
48 93 definitions of QI. One simple way to define QI is considering it an approach for improving  
49  
50 94 health service systems and processes through the routine use of health and programme  
51  
52 95 data to meet patient and programme needs (5). These definitions of quality and QI reveal the  
53  
54 96 central role of measurement for improvement in the improvement process. Measurement for  
55  
56 97 improvement refers to the process of collecting, analysing, and presenting quantitative and  
57  
58 98 qualitative data to demonstrate whether a change has resulted in an improvement (6).  
59  
60

1  
2  
3 99 Despite its importance, measurement for improvement is a less explored topic in QI research  
4  
5 100 and there is a need for further research in the area. With the growing importance of QI  
6  
7 101 knowledge in healthcare, there is a developing research interest in the QI curricula content,  
8  
9 102 the effectiveness of educational design and its link with organisational performance (7).  
10  
11 103 However, most QI programme evaluations focus on the improvement of knowledge, skills  
12  
13 104 and confidence of learners and do not offer insights into clinical and long-term effects (8).  
14  
15 105 Additionally, the measurement for improvement component is rarely evaluated.  
16  
17  
18 106 Existing models of training programme evaluation often have a narrow focus; they are  
19  
20 107 effective in measuring the outputs (what works) but do not provide insights into the process  
21  
22 108 that leads to training effectiveness (how it works) (9, 10). This highlights the need for  
23  
24 109 evaluation approaches that explore the processes that led to improvements. The impact of  
25  
26 110 contextual factors such as environment, management support and leadership, organisational  
27  
28 111 culture and data infrastructure also remains largely unexplored (11). There is also ambiguity  
29  
30 112 around the quality and effectiveness of the programmes and how the concepts and methods  
31  
32 113 are taught (12). One crucial aspect of improvement work is measurement. Measurement is  
33  
34 114 an important element in QI efforts as change needs to be measured to demonstrate  
35  
36 115 improvement and to identify and respond to variation (13). Learning how to measure quality  
37  
38 116 is an important skill for healthcare staff in general and those involved in QI in particular.  
39  
40  
41  
42 117 A systematic literature review revealed that there are no QI programme evaluation studies  
43  
44 118 focusing on evaluating the factors that influence development and use of measurement for  
45  
46 119 improvement skills of healthcare staff (14). There is a need to evaluate the effectiveness,  
47  
48 120 sustainability and spread of measurement for improvement programmes but there is  
49  
50 121 uncertainty around evaluation outcomes and methods. Measurement often gets  
51  
52 122 overshadowed by the overall focus on understanding QI and on outcomes, resulting in a  
53  
54 123 dearth of measurement for improvement research. Quality measurement is frequently  
55  
56 124 treated as an ancillary matter in healthcare systems' approach to QI (15). Research to  
57  
58 125 explore factors that will enable healthcare staff to embrace measurement for improvement  
59  
60

1  
2  
3 126 and appreciate its value in demonstrating outcomes is needed. In addition to this, many QI  
4  
5 127 teams are failing to fully implement measurement tools and techniques (16). Despite this  
6  
7 128 identified gap in measurement skills, there is little to no research exploring ways to develop  
8  
9 129 measurement for improvement skills in staff or to better understand the factors that influence  
10  
11 130 the development of these skills.

13  
14 131 The overall aim of this research is to understand the training, curricular and contextual  
15  
16 132 factors that inhibit or enable the success of measurement for improvement training by  
17  
18 133 utilising the experiences of trainees, trainers, programme, and site coordinators. The  
19  
20 134 research will be conducted in the Irish health system using two QI collaboratives (Pressure  
21  
22 135 Ulcers to Zero and Clinical Microsystems) which included dedicated training on  
23  
24 136 measurement for improvement. This paper presents an integrated evaluation framework  
25  
26 137 developed to address this research aim. This research started in August 2020 and is  
27  
28 138 expected to be completed by December 2021.

## 31 32 139 **METHODS**

### 33 34 140 **Theoretical underpinning**

35  
36  
37 141 The underlying assumption of this research is that the views of stakeholders about the  
38  
39 142 training programme and the context are required to make sense of this problem. This aligns  
40  
41 143 with the constructivist worldview. The constructivist worldview asserts that humans construct  
42  
43 144 meaning when they interact with the world and are influenced by historical and social  
44  
45 145 perspectives and context (17). Another objective of this research is to investigate what works  
46  
47 146 in a certain situation and why and then use this knowledge to develop solutions, linking the  
48  
49 147 research outcomes to recommended actions which is a characteristic of the pragmatist  
50  
51 148 worldview. The pragmatist worldview believes in the presence of multiple forms of reality and  
52  
53 149 that theories are extracted from actions and then applied back in practice through an  
54  
55 150 iterative process (18). This research thus contains elements from pragmatist and  
56  
57 151 constructivist viewpoints.  
58  
59  
60

1  
2  
3 152 This exploratory study uses an inductive approach to understand the research problem of  
4  
5 153 measurement for improvement programme effectiveness, sustainability, spread and  
6  
7 154 evaluation methods (19). The pragmatic constructivist approach asserts that reality is  
8  
9 155 constructed socially and experientially and propagates the use of inductive reasoning which  
10  
11 156 aligns most closely with this research (20). This research explores complex contextual and  
12  
13 157 human factors in a real-world healthcare setting making it suitable for a qualitative inquiry  
14  
15 158 (21). This research aim requires a design that can capture the complexity of the healthcare  
16  
17 159 system, the factors that impact programme development, implementation and evaluation and  
18  
19 160 provide evidence for policy action. A case study design can capture the complexity of  
20  
21 161 individual behaviour in institutional settings, factors that influence these, interrelationship of  
22  
23 162 actions and consequences, perceptions about programme goals from the perspective of  
24  
25 163 those who designed it and those who implemented it to provide an evidence base for  
26  
27 164 decision-making and explain success or failure (22). Thus, a case study design will be  
28  
29 165 adopted to capture the information required to adequately address this research question.  
30  
31  
32  
33 166 Case-study methodology is a bridge between research paradigms and offers flexibility in  
34  
35 167 epistemology, ontology, and methodology by providing a well-defined boundary and  
36  
37 168 structure within which appropriate methods can be applied (23). The aim of this study is to  
38  
39 169 gain an in-depth understanding of the factors that influence measurement for improvement  
40  
41 170 skill development and use in the real-world context which makes case study research a  
42  
43 171 suitable choice (24). Figure 1 summarises the research design choices in this research  
44  
45 172 through an adaptation of Saunders' research onion (19).

### 173 **Framework development process**

174 Programme evaluation should not be considered just a set of techniques but utilised as an  
175 integrated approach which is intricately linked with needs assessment, course design,  
176 course presentation, and transfer of training (25). It may be argued that considering these  
177 programme evaluation elements may add to strength of a study. Additionally, programme  
178 evaluation often gets neglected, with attention being narrowly focused on programme



1  
2  
3 179 development and implementation (26). This protocol aims to avoid these common pitfalls  
4  
5 180 and limitations and presents an evaluation framework which integrates these elements.  
6  
7  
8 181 Research suggests that instead of focusing on the development of a standardised appraisal  
9  
10 182 tool for quality measurement, evaluation should be guided by the purpose (27). This  
11  
12 183 research aims to retrospectively understand which curricular, training, and contextual factors  
13  
14 184 inhibit or enable the effectiveness, sustainability and spread of the measurement for  
15  
16 185 improvement training using a customised framework. Medical educators can select from  
17  
18 186 various individual programme evaluation models or use a combination to develop a  
19  
20 187 framework appropriate to answer their evaluation questions (28). This research draws on  
21  
22 188 two evaluation models to develop a tool suitable for this case study: The Kirkpatrick  
23  
24 189 Evaluation Model (29) and MUSIQ (30). The following sections describe the selected  
25  
26 190 evaluation models and provide justification for their use.  
27  
28  
29  
30 191

### 192 **Kirkpatrick evaluation model**

31  
32  
33  
34  
35 193 Kirkpatrick's model measures the impact of training at four levels; reaction of participants,  
36  
37 194 participant learning, change in behaviour and impact on the organisational results (29). The  
38  
39 195 model employs straightforward evaluation criteria and requires measurement of a limited  
40  
41 196 number of variables (31). The popularity of this model is attributed to its simplicity in outlining  
42  
43 197 a system for training outcome assessment and simplifying the complex evaluation process;  
44  
45 198 however, it is also criticised for being incomplete (32). The understanding about factors  
46  
47 199 which impact training effectiveness has grown over the years revealing that contextual  
48  
49 200 factors, individual characteristics, and training design elements play a critical role in training  
50  
51 201 success. However, the Kirkpatrick model does not account for these factors (32).  
52  
53  
54  
55 202 The model's underlying assumptions are also a source of criticism as it assumes that each  
56  
57 203 succeeding level provides more information than the previous one, each level is causally  
58  
59 204 linked to the other and the correlation between the levels is positive (33). It is independent of  
60

1  
2  
3 205 the learner's previous experience or learning, individual factors and other environmental and  
4  
5 206 contextual factors that can impact training success (31). The Kirkpatrick Model is outcome  
6  
7 207 focused and a drawback of such models is that although they provide a good understanding  
8  
9 208 of what was achieved, they offer little evidence about the process through which these  
10  
11 209 outputs were achieved and the related barriers and enablers. This emphasises the need to  
12  
13 210 go beyond the outcomes-focused Kirkpatrick model to understand how the programme  
14  
15 211 works (34). Some areas of improvement identified by previous studies in the Kirkpatrick  
16  
17 212 Model include paying more attention to the teaching and learning methods (31) and utilising  
18  
19 213 all four levels of the model over a longer period, and mechanisms for exploring possible  
20  
21 214 causal links among the four levels (35).

22  
23  
24  
25 215 Despite the criticism, the Kirkpatrick model has remained a popular choice for evaluating  
26  
27 216 learner outcomes in training programmes (28) and has been used to evaluate higher  
28  
29 217 education programmes, methodology workshops, professional development programmes  
30  
31 218 and short duration courses (36). This research will rely on the four levels presented by the  
32  
33 219 model but will adapt it to purpose of this research and account for these criticisms through  
34  
35 220 integrating the MUSIQ alongside the Kirkpatrick Model in a unified evaluation framework.

### 221 **Model for understanding success in quality (MUSIQ)**

222 Context can be defined as the "why" and "when" of change and includes influential factors  
223 from the outer setting and internal setting (37). Factors internal to the organisation can  
224 include organisational size, teams, leadership, culture, and implementation environment  
225 while external factors can include regulatory requirements, funding, and professional  
226 organisations (38).

227 The systematic literature review conducted in the exploratory phase of this research  
228 highlighted that success of developing data skills of healthcare professional for QI is not  
229 solely dependent on intervention design but also influenced by context (14). Thus, success  
230 of a QI intervention can vary across implementation settings (39). Most studies evaluating QI

1  
2  
3 231 programmes focus on the evaluation of the intervention and only few incorporate methods to  
4  
5 232 assess impact of contextual factors (40). The constructivist-pragmatist research problem  
6  
7 233 being investigated cannot be fully addressed without incorporating context into the  
8  
9 234 evaluation design.

11  
12 235 There is an increased interest in understanding the role of context in QI initiatives and  
13  
14 236 several frameworks and models have been developed to address this (41). One such model  
15  
16 237 is the MUSIQ model. The model acknowledges the system as a product of individual parts  
17  
18 238 and interrelationships. It identifies twenty-five contextual factors and their relative influence  
19  
20 239 at various levels of the healthcare system (30). The model was later revised to expand the  
21  
22 240 number of contextual factors to thirty-six. These new factors include external knowledge  
23  
24 241 (general and project specific), portfolio management, specialist staff, microsystem capacity,  
25  
26 242 and patient engagement (30). The factors presented in this model are relevant to this  
27  
28 243 research question and will be incorporated into this evaluation.

29  
30  
31  
32 244 The MUSIQ model is relatively new as it was published in 2012 and has been only used by a  
33  
34 245 handful of studies to date. Therefore, there is insufficient evidence to draw conclusions  
35  
36 246 regarding model usefulness, though studies have confirmed the observation of all original  
37  
38 247 factors in the QI initiatives being studied (42). One reported the framework and underlying  
39  
40 248 assumptions useful for interrogating the research question (43) and another reported that the  
41  
42 249 model was useful in identifying contextual constraints (44). The Kirkpatrick model focuses on  
43  
44 250 different outcome levels while MUSIQ adds another perspective of context at healthcare  
45  
46 251 system level. The MUSIQ model offers the missing link to context and relationships in the  
47  
48 252 Kirkpatrick model. The evaluation framework for this research focuses on integrating the two  
49  
50 253 models to address the aim of this research.

#### 51 52 53 254 **Integrated evaluation framework**

54  
55  
56 255 Knowing what information to collect, whom to collect it from and when to collect are critical  
57  
58 256 decisions in designing a comprehensive evaluation once the purpose of the evaluation has  
59  
60

257 been established (45). The proposed framework presented in Table 1 combines evaluation  
 258 perspectives from the two models and will be used to guide data collection through semi-  
 259 structured qualitative interviews and document analysis. A draft interview guide for  
 260 collaborative trainees based on the evaluation framework can be found in supplemental file  
 261 1.

262 **Table 1:**

263 **Title: Integrated evaluation framework**

| Model Components        | Definitions                   |                                                                                                                   |
|-------------------------|-------------------------------|-------------------------------------------------------------------------------------------------------------------|
| External environment    | External motivators           | External factors that stimulate the organisation to focus on the QI project                                       |
|                         | Project sponsorship           | External entities contributing personnel, expertise, equipment, facilities, or other resources for project        |
| Organisation            | QI leadership                 | Senior leadership commitment to champion and support QI project                                                   |
|                         | Senior leader project sponsor |                                                                                                                   |
|                         | Culture supportive of QI      | Values, beliefs, and norms of an organisation that shape the behaviours of staff in pursuing QI                   |
|                         | Maturity of organisational QI | Sophistication of the organisation's QI programmes                                                                |
|                         | Staff engagement              | Steps taken by the organisation for continued staff engagement in QI                                              |
| QI support and capacity | Data infrastructure           | Extent to which a system exists to collect, manage, and facilitate the use of data<br>Effective use of technology |
|                         | Resource availability         | Support for QI, including allocation of resources, finances, and staff time                                       |
|                         | Workforce focus on QI         | Workforce development through training and engagement in QI                                                       |

|                                          |                                                          |                                                                                                                            |
|------------------------------------------|----------------------------------------------------------|----------------------------------------------------------------------------------------------------------------------------|
| QI team and<br>Microsystem               | Team diversity                                           | Diversity of team members with respect to professional discipline, personality, motivation, and perspective                |
|                                          | Physician involvement                                    | Contribution of physicians to the QI team efforts                                                                          |
|                                          | Subject matter expert                                    | Team member/members knowledgeable about measurement                                                                        |
|                                          | Prior QI experience                                      | Prior experience with QI                                                                                                   |
|                                          | Team leadership                                          | Team leader's ability to accomplish the goals of the improvement project by guiding the QI team                            |
|                                          | Team norms                                               | Team establishes strong norms of behaviour about QI goal achievement                                                       |
|                                          | Team QI skill/capability for improvement                 | Team's ability to use improvement methods to make changes                                                                  |
|                                          | Motivation to change                                     | Extent to which team members have a desire and willingness to improve                                                      |
|                                          | QI Accountability                                        | Clearly stated and communicated responsibility and accountability in the project                                           |
| Trigger<br>(Training<br>Event)           | Participation and Reaction<br>(Kirkpatrick Level 1)      | Overall satisfaction with the programme, content, delivery, logistics, facilitators etc                                    |
|                                          | Knowledge, Skills and Attitudes<br>(Kirkpatrick Level 2) | Improvement in knowledge and skills reported by participants immediately after the intervention                            |
| Outcomes/pro<br>cess & system<br>changes | Behaviour Change<br>(Kirkpatrick Level 3)                | Confidence in measurement skills<br>Maintaining and advancing the skills learned<br>Continued Spread and involvement in QI |
|                                          | Learning Networks                                        | Development of QI networks among post-intervention                                                                         |
|                                          | QI Capacity development                                  | Ability of participants to initiate and lead other projects<br>Ability of participants to train/help other staff           |
|                                          | Change in Organisational Practice and/or                 | Sustainability in outcomes achieved<br>Sustainability in practices<br>Process changes as a result of the training event    |

|  |                                           |                                                                      |
|--|-------------------------------------------|----------------------------------------------------------------------|
|  | Patient Outcomes<br>(Kirkpatrick Level 4) |                                                                      |
|  | Dissemination/spread                      | Spread of knowledge and improved practices to non-intervention units |
|  | Unintended consequences                   | Negative or positive, unanticipated outcomes                         |

264

## 265 Case design

266 This research study will use a multiple case design (24). A multiple case design is suited for  
 267 this study because measurement for improvement training occurs at a common venue where  
 268 it is attended by healthcare staff from diverse backgrounds and multiple organisations.  
 269 Participants then return to their own organisations to apply their learning. In Ireland, the  
 270 National QI Team within the Health Service Executive (HSE) is responsible for partnering  
 271 with health and social care services to promote sustainable QI. The Measurement for  
 272 Improvement (MFI) curriculum (6) is one such effort to train staff in handling quantitative and  
 273 qualitative data for QI. The curriculum identifies and outlines essential components of high-  
 274 quality Measurement for Improvement (MFI) training to ensure a consistent standard of  
 275 training for the Irish Healthcare staff (6). The purpose of this research is to apply the  
 276 integrated framework to evaluate the measurement for improvement curriculum.

## 277 Case selection

278 The bounded systems are the training collaboratives in which the training was imparted. The  
 279 trainees belonged to different organisations who came together for the training and then  
 280 implemented the skills in their own organisational contexts. This research design therefore  
 281 consists of two cases; the Pressure Ulcers to Zero collaborative (PUTZ) and Clinical  
 282 Microsystems collaborative, which delivered measurement for improvement training. The  
 283 PUTZ collaborative took place between 2016 and 2018. The aim of the collaborative was to  
 284 reduce ward acquired pressure ulcers by 50% in participating teams within six months and  
 285 sustain the achieved results at twelve months (46). The microsystems collaborative occurred

1  
2  
3 286 in 2017 and its aim was to improve the quality of patient care and work life of the emergency  
4  
5 287 departments' staff participating in the collaborative (47). Both collaboratives consisted of 3  
6  
7 288 training days and activity periods in between, with measurement for improvement being an  
8  
9 289 important component of the training content.  
10

11  
12 290

### 15 291 **Researcher reflexivity statement**

16  
17  
18 292 The lead researcher immersed herself in the work of the National QI Team of the Health  
19  
20 293 Service Executive (HSE) Ireland to develop a deeper understanding of their work,  
21  
22 294 understand the context for measurement for improvement and the aims and objectives of the  
23  
24 295 training programmes. This immersion and ethnographic observation provided invaluable  
25  
26 296 opportunity to the researcher to observe and work on various other projects of the National  
27  
28 297 QI Team. The researcher, therefore, developed an insider perspective about the operations  
29  
30 298 and culture of the health system, something which facilitated a better understanding when  
31  
32 299 participants described aspects of the system such as bureaucracy. However, one possible  
33  
34 300 drawback of this could be a preference for 'trainer' views due to the researcher's familiarity  
35  
36 301 with these individuals. To counter this, the researcher will structure the analysis into trainer  
37  
38 302 and trainee perspectives so that both perspectives are included in a balanced analysis. As  
39  
40 303 an additional quality step, the emerging findings will be presented to the research team to  
41  
42 304 challenge assumptions and increase trustworthiness.  
43  
44  
45

### 46 305 **Patient and public involvement statement**

47  
48 306 There was no patient or public involvement in the study. The study collected data from  
49  
50 307 healthcare staff about their experiences of participating in a QI training programme and did  
51  
52 308 not require any data from patients or the public.  
53  
54

55 309

56  
57  
58 310  
59  
60



1  
2  
3 311 **Data collection**  
4  
5

6 312 Data collection will be conducted using multiple sources of evidence through semi-structured  
7  
8 313 interviews with training participants, trainers and site coordinators and document analysis. A  
9  
10 314 case study database in the form of electronic files will be maintained for this case study  
11  
12 315 research. The database will have two main sections; the evidence or data collected and  
13  
14 316 reports of the investigators (24).  
15  
16

17 317 The study population will include healthcare staff who were trained, those who delivered  
18  
19 318 training, site coordinators of participating sites, leads of the two collaboratives in the HSE.  
20

21 319 The trainee population ranges from senior-level staff such as Assistant Directors of Nursing  
22  
23 320 to frontline staff such as healthcare assistants and nurses. This research will use a  
24  
25 321 purposive sampling strategy by including participants who shared the common experience of  
26  
27 322 the training and had participated in the two collaboratives (48). This is purposely kept broad  
28  
29 323 as both collaboratives were completed more than two years ago as the researchers  
30  
31 324 anticipate challenges in recruiting participants. Participation in the study will be on a  
32  
33 325 voluntary basis and the researcher will describe the nature of the study in detail to the  
34  
35 326 participants and answer all questions prior to any data collection. The National QI Team will  
36  
37 327 serve as a gatekeeper for participant recruitment for trainees and send a letter to introduce  
38  
39 328 the researcher to participants The recruitment letter is available in Supplemental File 2.  
40  
41 329 Those willing to participate would then contact the researcher and written informed consent  
42  
43 330 will be obtained. The study consent form is available in Supplemental File 3.  
44  
45  
46

47 331 The data collection will be conducted via semi-structured interviews and document analysis.  
48

49 332 The semi-structured interviews will be conducted by the lead author. The interview method  
50  
51 333 will allow the researcher to capture the words, thoughts, feelings, perceptions, and  
52  
53 334 experiences of the participants to answer the research question (49). The first two interviews  
54  
55 335 will be used as a pilot to review the interview guide and make changes if required. The  
56  
57 336 collected documents will be used to inform participant reaction and learning (Kirkpatrick  
58  
59 337 levels 1 and 2). These documents will include (depending on the availability) the end of  
60



1  
2  
3 338 collaborative reports and any feedback forms used during the collaboratives. Level 3 and 4  
4  
5 339 data along with contextual factors (from MUSIQ framework) will be collected through  
6  
7 340 interviews. This research aims to recruit all trainers, both leads of the two collaboratives in  
8  
9 341 the HSE, and 10 participants from each collaborative.

### 12 342 **Data processing**

15 343 The interviews will be audio recorded and transcribed and anonymised. Site pseudonyms  
16  
17 344 will be used. A field journal will be maintained by the researcher while interviewing which will  
18  
19 345 be used to make a note of researcher's assumptions, feelings and biases and reflections on  
20  
21 346 the interviews. After each interview, the recording will be analysed to improve the  
22  
23 347 researcher's performance as an interviewer. A case database will be maintained to store all  
24  
25 348 collected data.

### 28 349 **Data analysis**

31 350 The data analysis of case studies involves a detailed description of the setting or individuals  
32  
33 351 and analysis of the data for themes or issues (50). A detailed description of the training  
34  
35 352 programme, sites and participants will be followed by a thematic analysis of the qualitative  
36  
37 353 interview data and the documents collected. The coding and analysis framework is  
38  
39 354 presented in Figure 2 (51). Coding process will be aided by the NVivo12 software which  
40  
41 355 provides a platform for data management, querying and visualisation (52).

44 356 This qualitative analysis will rely on the same theoretical and analytical strategy to study both  
45  
46 357 cases and then the patterns found in each case will be compared (24). The comparison  
47  
48 358 between the two cases will be performed. The involves analysing the data in new ways,  
49  
50 359 explore relationships and the cluster the data so contrasts, and similarities emerge (53).

### 53 360 **Ensuring rigour**

56 361 Rigour will be ensured by triangulating through multiple sources of data by including  
57  
58 362 perspectives of multiple stakeholders and multiple data collection methods. Data collection  
59  
60

1  
2  
3 363 and analysis methods and researcher reflexivity will be clearly documented to ensure  
4  
5 364 transparency. At the analysis stage, two other researchers will review codes collectively in  
6  
7 365 regular meetings (54). The researchers aim to perform member checking by contacting 10%  
8  
9 366 of the participants and sharing a summary of results. The researchers also aim to perform  
10  
11 367 member checking with a broader audience through an interactive webinar. The HSE  
12  
13 368 regularly conducts QI webinars, and this platform would be useful for reaching healthcare  
14  
15 369 professionals interested in QI and enable the researchers to obtain and incorporate  
16  
17 370 feedback from a wider audience into the results. The other method of dissemination would  
18  
19 371 be through peer-reviewed journal articles which would strengthen the awareness about this  
20  
21 372 study. To incorporate the impact of the COVID-19 pandemic on this research process and  
22  
23 373 the work practices of healthcare staff, questions to explore the role of QI education and  
24  
25 374 measurement for improvement in adapting to new ways of working are included in the  
26  
27 375 interview topic guide.

## 376 **DISCUSSION**

377 Measurement for improvement is an essential skill for healthcare staff as it can be used to  
378 monitor and support improvement and enhance the quality of care(55). This research aims  
379 to explore training, curricular and contextual factors that can help in the development and  
380 use of measurement for improvement skills in healthcare staff. To our knowledge, no  
381 previous studies have evaluated measurement for improvement programmes. Additionally,  
382 many QI programmes are not appropriately evaluated, peer-reviewed or published (56)  
383 therefore it is difficult to access any work on measurement for improvement skills that may  
384 have been conducted before.

385 Theoretically, this research will contribute towards the current understanding of the two  
386 models. It will add to the evidence base of MUSIQ model and confirm the existence or non-  
387 existence of the contextual factors and relationships presented in the model. The study uses  
388 MUSIQ model in a qualitative design while majority of the previous studies have relied on  
389 quantitative approaches. It will study all four levels proposed in the Kirkpatrick model which

1  
2  
3 390 is less common in previous studies. The integrated framework is a theoretical contribution to  
4  
5 391 the field and the analysis will also reflect on the useful and effectiveness of the approach.  
6  
7

8 392 Although qualitative research may not be generalisable, this research will be one of the few  
9  
10 393 studies focusing on measurement for improvement and will reveal a multitude of avenues for  
11  
12 394 future research. The results will not only be of importance for QI/measurement training  
13  
14 395 design, but also for evaluation purposes and for healthcare organisations and systems.

15  
16 396 There is a need for further research in the evaluation of QI programmes in terms of their  
17  
18 397 immediate and long-term impacts. Measurement for improvement is an important but less  
19  
20 398 explored topic in programme evaluations and there is need to expand the understanding of  
21  
22 399 what to teach, how to teach and how to evaluate programmes that aim to train healthcare  
23  
24 400 staff in quantitative and qualitative data skills. Programme evaluation should be viewed as a  
25  
26 401 driving force for future programme design and policy. Instead of focusing on using  
27  
28 402 standardised models, this study takes a customised evaluation approach, appropriate to  
29  
30 403 answer this research question which is a theoretical contribution to the field. This approach  
31  
32 404 is expected to expand the empirical and theoretical understanding of factors that influence  
33  
34 405 the development and use of measurement for improvement skills in healthcare staff. Another  
35  
36 406 expected impact of this research will be to deepen the understanding of contextual factors  
37  
38 407 that impacted programme success at various levels of the healthcare system.  
39  
40

#### 41 42 408 **ETHICS AND DISSEMINATION**

43  
44  
45 409 The study has received exemption from full ethical review from the Human research ethics  
46  
47 410 committee of University College Dublin, Ireland (LS-E-19-108). The results of the study will  
48  
49 411 be disseminated in peer reviewed journals.  
50

#### 51 52 412 **AUTHORS' CONTRIBUTIONS**

53  
54  
55 413 ZK developed the methodology and prepared the initial draft in consultation with ADB and  
56  
57 414 EM. ADB and EM provided substantive feedback on the draft which was revised by ZK. All  
58  
59 415 authors have read and approved the final manuscript.  
60

1  
2  
3 416 **COMPETING INTERESTS**  
4  
5

6 417 The authors have no competing interests to declare.  
7

8  
9 418 **FUNDING STATEMENT**  
10

11 419 The corresponding author (ZK) is receiving a PhD funding from the Health Service Executive  
12 Ireland (Project reference 57399). The study is also supported by the Irish Health Research  
13 Board (RL-2015-1588). The funding sources had no influence on the design of this study,  
14  
15 421 analyses, interpretation of the data, or decision to publish results.  
16  
17 422  
18  
19

20 423 **REFERENCES**  
21  
22

- 23 424 1. Mosadeghrad AM. A conceptual framework for quality of care. *Mater Sociomed*  
24 2012;24(4):251-61. doi: 10.5455/msm.2012.24.251-261 [published Online First: 2012/01/01]  
25 425  
26  
27  
28 426 2. Allen-Duck A, Robinson JC, Stewart MW. Healthcare Quality: A Concept Analysis. *Nurs*  
29 427 *Forum* 2017;52(4):377-86. doi: 10.1111/nuf.12207 [published Online First: 2017/04/14]  
30  
31  
32  
33 428 3. Donabedian A. The Definition of Quality and Approaches to Its Assessment. Vol 1.  
34 429 Explorations in Quality Assessment and Monitoring. Ann Arbor, Michigan, USA: Health  
35 430 Administration Press 1980  
36  
37  
38  
39  
40 431 4. The Health Foundation. Quality improvement made simple: What everyone should know  
41 432 about health care quality improvement, 2013  
42  
43  
44  
45 433 5. World Health Organisation. Operations manual for staff at primary health care centres.  
46 434 Geneva Switzerland, 2008  
47  
48  
49  
50 435 6. Quality Improvement Division. Measurement for Improvement Curriculum. Dublin, Ireland:  
51 436 Health Service Executive, 2017  
52  
53  
54  
55 437 7. Smith F, Alexandersson P, Bergman B, et al. Fourteen years of quality improvement  
56 438 education in healthcare: a utilisation-focused evaluation using concept mapping. *BMJ Open*  
57 439 *Quality* 2019;8(4):e000795. doi: 10.1136/bmjopen-2019-000795  
58  
59  
60

- 1  
2  
3 440 8. O'Leary KJ, Fant AL, Thurk J, et al. Immediate and long-term effects of a team-based  
4  
5 441 quality improvement training programme. *BMJ Quality & Safety* 2019;28(5):366-73. doi:  
6  
7 442 10.1136/bmjqs-2018-007894  
8  
9  
10 443 9. Sitzmann T, Weinhardt JM. Training Engagement Theory: A Multilevel Perspective on the  
11  
12 444 Effectiveness of Work-Related Training. *Journal of Management* 2018;44(2):732-56. doi:  
13  
14 445 10.1177/0149206315574596  
15  
16  
17 446 10. Bates P, Mendel P, Robert G. Organizing for quality: the improvement journeys of  
18  
19 447 leading hospitals in Europe and the United States: Abingdon, UK: Radcliffe Publishing, 2008  
20  
21  
22 448 11. Silver SA, McQuillan R, Harel Z, et al. How to Sustain Change and Support Continuous  
23  
24 449 Quality Improvement. *Clinical journal of American Society of Nephrology* 2016; 11:916–24.  
25  
26  
27 450 12. The Health Foundation. Quality improvement training for healthcare professionals.  
28  
29 451 Evidence Scan. United Kingdom: The Health Foundation, 2012  
30  
31  
32 452 13. Varkey P, Reller MK, Resar RK. Basics of quality improvement in health care. *Mayo Clin*  
33  
34 453 *Proc. England*, 2007:735-9  
35  
36  
37 454 14. Khurshid Z, De Brún A, Martin J, et al. A Systematic Review and Narrative Synthesis:  
38  
39 455 Determinants of the Effectiveness and Sustainability of Measurement-Focused Quality  
40  
41 456 Improvement Trainings. *Journal of Continuing Education in the Health Professions* 2021; doi:  
42  
43 457 10.1097/CEH.0000000000000331  
44  
45  
46 458 15. Austin JM, Kachalia A. The State of Health Care Quality Measurement in the Era of  
47  
48 459 COVID-19: The Importance of Doing Better. *Jama* 2020;324(4):333-34. doi:  
49  
50 460 10.1001/jama.2020.11461  
51  
52  
53 461 16. Dixon-Woods M, McNicol S, Martin G. Ten challenges in improving quality in healthcare:  
54  
55 462 lessons from the Health Foundation's programme evaluations and relevant literature. *BMJ*  
56  
57 463 *Quality & Safety* 2012;21(10):876-84. doi: 10.1136/bmjqs-2011-000760  
58  
59  
60

- 1  
2  
3 464 17. Crotty M. The Foundations of Social Research: Meaning and Perspective in the  
4  
5 465 Research Process. Thousands Oaks California: Sage Publications 1998  
6  
7  
8 466 18. Christ TW. The worldview matrix as a strategy when designing mixed methods research.  
9  
10 467 International Journal of Multiple Research Approaches 2013;7(1):110-18. doi:  
11  
12 468 10.5172/mra.2013.7.1.110  
13  
14  
15 469 19. Saunders M, Lewis P, Thornhill A. Research methods for business students. Seventh ed.  
16  
17 470 Harlow: Pearson Education Limited 2016  
18  
19  
20 471 20. Merriam SB. Qualitative research and case study applications in education. In: Merriam  
21  
22 472 SB, ed. 2nd ed. ed. San Francisco: Jossey-Bass Publishers, 1998  
23  
24  
25 473 21. Anderson C. Presenting and evaluating qualitative research. American journal of  
26  
27 474 pharmaceutical education 2010;74(8):141-41. doi: 10.5688/aj7408141  
28  
29  
30 475 22. Simons H. Case study research in practice. London;Los Angeles;; SAGE 2009  
31  
32  
33 476 23. Luck L, Jackson D, Usher K. Case study: a bridge across the paradigms. Nursing Inquiry  
34  
35 477 2006;13(2):103-09. doi: 10.1111/j.1440-1800.2006.00309.x  
36  
37  
38 478 24. Yin RK. Case Study Research: Design and Methods. Third ed: SAGE Publications 2003  
39  
40  
41 479 25. Marguerite F. Evaluation of training and development programs: A review of the  
42  
43 480 literature. Australasian Journal of Educational Technology 1989;5(2) doi: 10.14742/ajet.2340  
44  
45  
46 481 26. Cook DA. Twelve tips for evaluating educational programs. Medical Teacher  
47  
48 482 2010;32(4):296-301. doi: 10.3109/01421590903480121  
49  
50  
51 483 27. Yardley S, Dornan T. Kirkpatrick's levels and education 'evidence'. Med Educ  
52  
53 484 2012;46(1):97-106. doi: 10.1111/j.1365-2923.2011.04076.x [published Online First:  
54  
55 485 2011/12/14]  
56  
57  
58  
59  
60

- 1  
2  
3 486 28. Frye AW, Hemmer PA. Program evaluation models and related theories: AMEE guide  
4  
5 487 no. 67. *Med Teach* 2012;34(5):e288-99. doi: 10.3109/0142159x.2012.668637 [published  
6  
7 488 Online First: 2012/04/21]  
8  
9  
10 489 29. Kirkpatrick DL. Techniques for Evaluation Training Programs. *Journal of the American*  
11  
12 490 *Society of Training Directors* 1959;13:21-26  
13  
14  
15 491 30. Kaplan HC, Provost LP, Froehle CM, et al. The Model for Understanding Success in  
16  
17 492 Quality (MUSIQ): building a theory of context in healthcare quality improvement. *BMJ Quality*  
18  
19 493 *& Safety* 2012;21(1):13-20. doi: 10.1136/bmjqs-2011-000010  
20  
21  
22 494 31. Heydari MR, Taghva F, Amini M, et al. Using Kirkpatrick's model to measure the effect of  
23  
24 495 a new teaching and learning methods workshop for health care staff. *BMC Research Notes*  
25  
26 496 2019;12(1):388. doi: 10.1186/s13104-019-4421-y  
27  
28  
29 497 32. Bates R. A critical analysis of evaluation practice: the Kirkpatrick model and the principle  
30  
31 498 of beneficence. *Evaluation and Program Planning* 2004;27(3):341-47. doi:  
32  
33 499 <https://doi.org/10.1016/j.evalprogplan.2004.04.011>  
34  
35  
36 500 33. Alliger GM, Janak EA. Kirkpatrick's levels of training criteria: thirty years later. *Personnel*  
37  
38 501 *Psychology* 1989;42(2):331-42. doi: 10.1111/j.1744-6570.1989.tb00661.x  
39  
40  
41 502 34. Parker K, Burrows G, Nash H, et al. Going beyond Kirkpatrick in evaluating a clinician  
42  
43 503 scientist program: it's not "if it works" but "how it works". *Acad Med* 2011;86(11):1389-96.  
44  
45 504 doi: 10.1097/ACM.0b013e31823053f3 [published Online First: 2011/09/29]  
46  
47  
48 505 35. Reio TG, Rocco TS, Smith DH, et al. A Critique of Kirkpatrick's Evaluation Model. *New*  
49  
50 506 *Horizons in Adult Education and Human Resource Development* 2017;29(2):35-53. doi:  
51  
52 507 <https://doi.org/10.1002/nha3.20178>  
53  
54  
55 508 36. Moldovan L. Training Outcome Evaluation Model. *Procedia Technology* 2016;22:1184-  
56  
57 509 90. doi: <https://doi.org/10.1016/j.protcy.2016.01.166>  
58  
59  
60



- 1  
2  
3 510 37. Pettigrew A, Ferlie E, McKee L. Shaping strategic change - The case of the NHS in the  
4  
5 511 1980s. *Public Money & Management* 1992;12(3):27-31. doi: 10.1080/09540969209387719  
6  
7  
8 512 38. Wiig S, Aase K, Johannessen T, et al. How to deal with context? A context-mapping tool  
9  
10 513 for quality and safety in nursing homes and homecare (SAFE-LEAD Context). *BMC*  
11  
12 514 *Research Notes* 2019;12(1):259. doi: 10.1186/s13104-019-4291-3  
13  
14  
15 515 39. Hovlid E, Bukve O. A qualitative study of contextual factors' impact on measures to  
16  
17 516 reduce surgery cancellations. *BMC Health Services Research* 2014;14(1):215. doi:  
18  
19 517 10.1186/1472-6963-14-215  
20  
21  
22 518 40. Øvretveit JC, Shekelle PG, Dy SM, et al. How does context affect interventions to  
23  
24 519 improve patient safety? An assessment of evidence from studies of five patient safety  
25  
26 520 practices and proposals for research. *BMJ Quality & Safety* 2011;20(7):604-10. doi:  
27  
28 521 10.1136/bmjqs.2010.047035  
29  
30  
31 522 41. Coles E, Wells M, Maxwell M, et al. The influence of contextual factors on healthcare  
32  
33 523 quality improvement initiatives: what works, for whom and in what setting? Protocol for a  
34  
35 524 realist review. *Systematic Reviews* 2017;6(1):168. doi: 10.1186/s13643-017-0566-8  
36  
37  
38 525 42. Reed JE, Kaplan HC, Ismail SA. A new typology for understanding context: qualitative  
39  
40 526 exploration of the model for understanding success in quality (MUSIQ). *BMC Health Serv*  
41  
42 527 *Res* 2018;18(1):584. doi: 10.1186/s12913-018-3348-7 [published Online First: 2018/07/27]  
43  
44  
45 528 43. Griffin A, McKeown A, Viney R, et al. Revalidation and quality assurance: the application  
46  
47 529 of the MUSIQ framework in independent verification visits to healthcare organisations. *BMJ*  
48  
49 530 *Open* 2017;7(2):e014121. doi: 10.1136/bmjopen-2016-014121 [published Online First:  
50  
51 531 2017/02/16]  
52  
53  
54 532 44. Eboreime EA, Nxumalo N, Ramaswamy R, et al. Strengthening decentralized primary  
55  
56 533 healthcare planning in Nigeria using a quality improvement model: how contexts and actors  
57  
58  
59  
60



- 1  
2  
3 534 affect implementation. Health Policy Plan 2018;33(6):715-28. doi: 10.1093/heapol/czy042  
4  
5 535 [published Online First: 2018/05/10]  
6  
7  
8 536 45. Dahiya S, Jha A. Review of training evaluation. International Journal of Computer  
9  
10 537 Science and Communication 2011;2(1):11– 16.  
11  
12  
13 538 46. Murphy L, Browne M, Branagan O, et al. Final Report: Pressure Ulcers to Zero  
14  
15 539 Collaborative: Health Service Executive, Ireland, 2018.  
16  
17  
18 540 47. Toland L, Naddy B, Crowley P. Clinical Microsystems in the Emergency Department.  
19  
20 541 International Journal of Integrated Care 2017;17:547. doi: 10.5334/ijic.3867  
21  
22  
23 542 48. Newell R, Burnard P. Research for evidence-based practice in healthcare. Chichester:  
24  
25 543 Wiley-Blackwell 2011  
26  
27  
28 544 49. Holloway I. Qualitative Research In Health Care: Open University Press 2005  
29  
30  
31 545 50. Stake R. The art of case study research. Thousand Oaks, California: Sage Publications  
32  
33 546 1995  
34  
35  
36 547 51. Saldana J. The coding manual for qualitative researchers. 3rd ed. Los Angeles: SAGE  
37  
38 548 2015  
39  
40  
41 549 52. NVivo qualitative data analysis software [program]. Version 12 version, 2018  
42  
43  
44 550 53. Miles MB, Huberman M. Qualitative data analysis: an expanded source-book. Second  
45  
46 551 ed. Thousand Oaks California: Sage Publications 1994:338  
47  
48  
49 552 54. Mays N, Pope C. Assessing quality in qualitative research. BMJ 2000;320(7226):50-52.  
50  
51 553 doi: 10.1136/bmj.320.7226.50  
52  
53  
54 554 55. Shah A. Using data for improvement. BMJ 2019;364:l189. doi: 10.1136/bmj.l189  
55  
56  
57 555 56. Jones EL, Dixon-Woods M, Martin GP. Why is reporting quality improvement so hard? A  
58  
59 556 qualitative study in perioperative care. BMJ Open 2019;9(7):e030269. doi: 10.1136/bmjopen-  
60  
557 2019-030269

1  
2  
3 558 **FIGURE TITLES AND LEGENDS**  
4

5  
6 559 **FIGURE 1**  
7

8  
9 560 **Title:** Research design choices through an adaptation of Saunders' research onion  
10

11 561 **Legend:** Flow chart of Research design choices for the study through an adaptation of  
12  
13 Saunders' research onion  
14

15  
16 563 **FIGURE 2**  
17

18  
19 564 **Title:** Coding and Analysis Framework  
20

21  
22 565 **Legend:** Description of coding and analysis steps adapted from Johnny Saldana's coding  
23  
24 methodology  
25

26  
27 567  
28

29  
30 568  
31

32  
33 569  
34

35  
36 570  
37

38  
39 571  
40

41  
42 572  
43

44  
45 573  
46

47  
48 574  
49

50  
51 575  
52

53  
54 576  
55

56  
57 577  
58  
59  
60

Figure 1

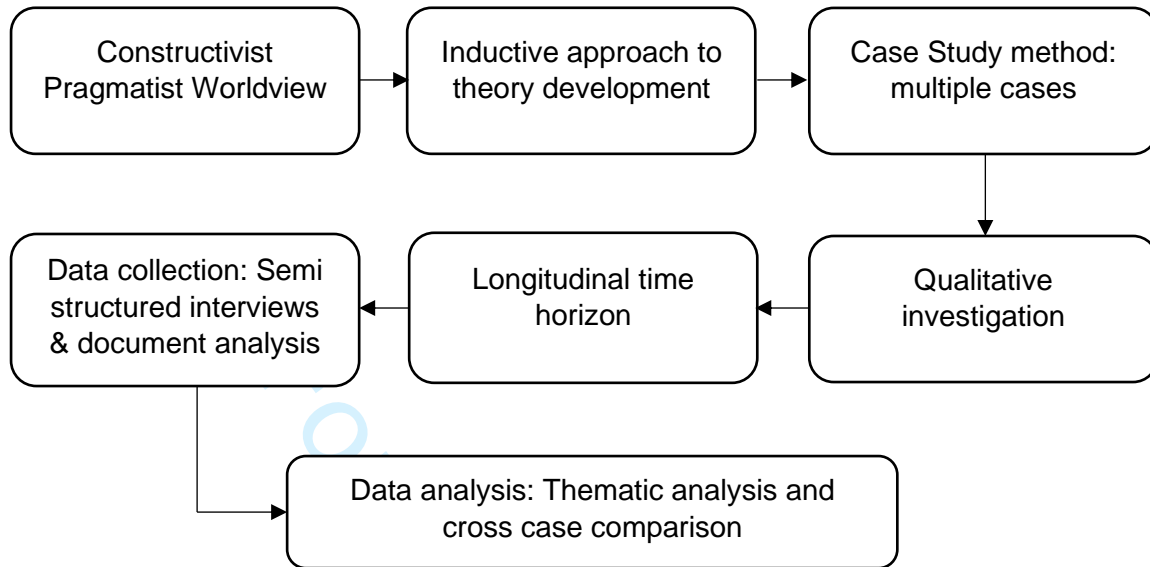

Figure 2

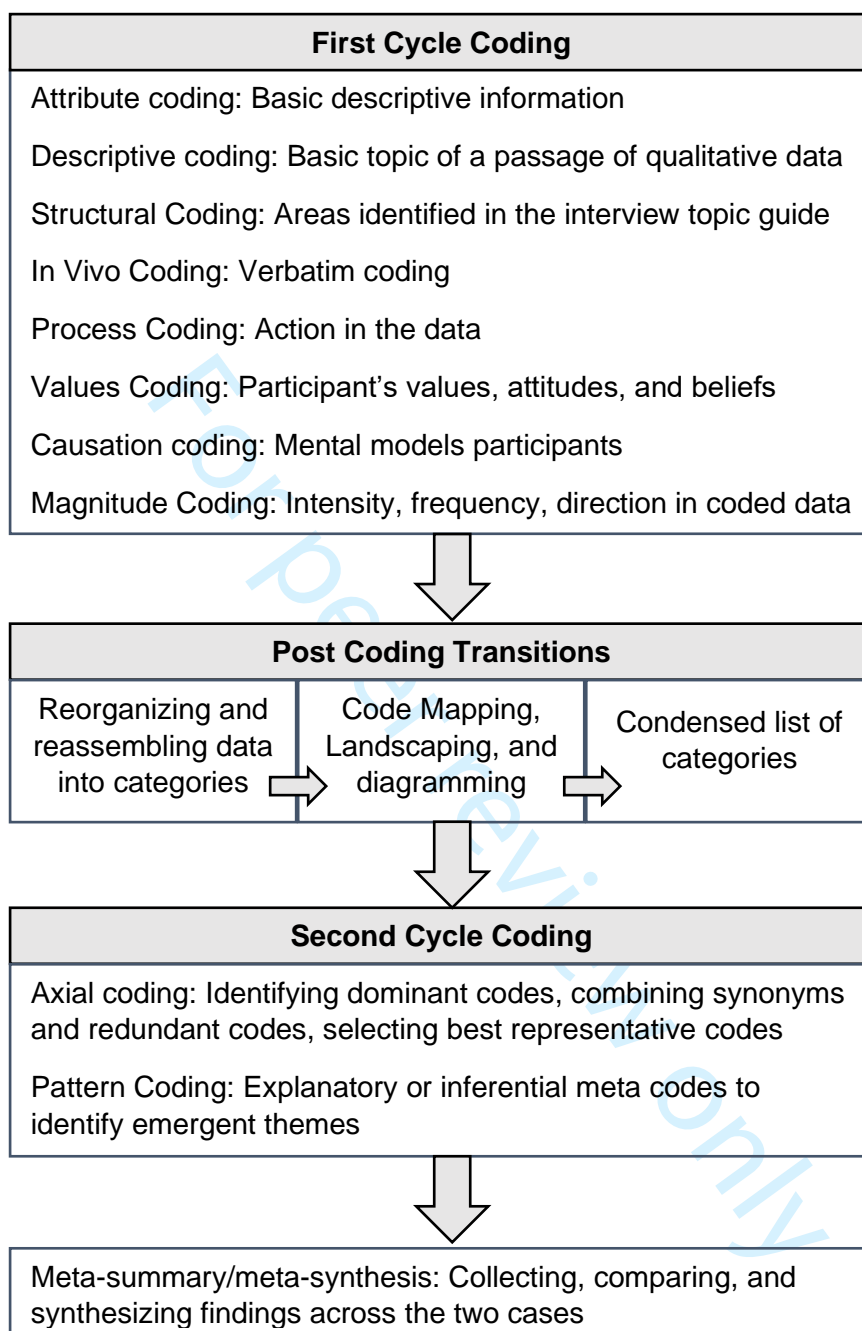

## Supplemental File 1: Sample interview topic guide for collaborative trainees

### Introduction

- What is your professional background and what is your current job role?
- How did you become a part of the PUTZ/microsystems collaborative?
- What were your expectations regarding learning measurement for improvement/QI during the training?
- Did you have any knowledge of or experience in using measurement/QI techniques prior to the collaborative?

### Effectiveness

- Looking back, how would you assess the suitability of the collaborative for your needs?
  - PROBES
  - Session content
  - Session format/logistics
  - Coaching and support
- If you can recall, which concepts were easier to understand for the team and which areas you struggled with?
- Did you find the measurement techniques to be useful to your work?
- What factors could have made the training more effective and usable for you?
- What challenges/barriers did you face while implementation?

### Sustainability

- Do you think you have been able to retain the skills 2 years after the collaborative?
  - PROBES
  - Retention as a team
- Do you still use some or all the skills in your work? Could you give some examples?
- Do you think the training gave you an advantage over staff who did not attend the training?
- What motivated you to sustain this knowledge?
- What factors facilitated sustaining these skills in the long term?

- 1
- 2
- 3 ○ PROBES
- 4 ○ Support from senior and frontline managers
- 5 ○ Data Infrastructure within organization
- 6 ○ Resource availability
- 7 ○ External and Internal motivating factors
- 8 ○ Team capacity
- 9
- 10
- 11
- 12
- 13
- 14 • Would you like to remain involved in work that requires the use of these skills?
- 15 • Would you like to enhance your measurement/QI skills further?
- 16
- 17

### 18 Spread

- 19
- 20 • Have you shared your knowledge with colleagues in your own team and
- 21 department? If yes, what means (formal or informal) used to spread this
- 22 knowledge?
- 23
- 24 • Would you say all members of the team, regardless of their participation in the
- 25 training, feel comfortable applying these skills?
- 26
- 27 • Have you shared your knowledge with those outside the team, department, or
- 28 organization?
- 29
- 30 • What motivates you to share knowledge with others?
- 31
- 32 • Would you know others, within the organization or outside, who are experts in
- 33 measurement and QI methods, and do you consult them if there is a need?
- 34
- 35 • What were the challenges in spreading knowledge?
- 36
- 37 • What were the enablers in spreading knowledge?
- 38 ○ PROBES
- 39 ○ Role of leaders
- 40 ○ Supportive culture of the organization
- 41 ○ Availability of resources
- 42
- 43
- 44
- 45
- 46
- 47

### 48 COVID-19

- 49
- 50
- 51 • Have there been any changes in the way you or your teamwork during the
- 52 pandemic?
- 53 ○ PROBE
- 54 ○ Organizational level changes
- 55
- 56
- 57
- 58
- 59
- 60

- 1  
2  
3  
4  
5  
6  
7  
8  
9  
10  
11  
12  
13  
14  
15  
16  
17  
18  
19  
20  
21  
22  
23  
24  
25  
26  
27  
28  
29  
30  
31  
32  
33  
34  
35  
36  
37  
38  
39  
40  
41  
42  
43  
44  
45  
46  
47  
48  
49  
50  
51  
52  
53  
54  
55  
56  
57  
58  
59  
60
- Did your QI and measurement skills help you in changing and adapting to the new clinical pathways? Did you use any QI or measurement skills, approaches or tools during this time?
  - What support in QI methods and knowledge could have made this transition easier for you?
  - For the foreseeable future it is likely that training will be delivered virtually - what would be your opinion on distance learning for QI and measurement skills
  - Is there anything else you would like to add that could help improve the training?

## Supplemental File 2: Recruitment letter

Dear Colleague,

This letter is to introduce Zuneera Khurshid, a PhD student enrolled at University College Dublin (UCD) supervised by Professor Eilish McAuliffe, engaged by the National Quality Improvement Team (NQIT) to conduct research on the effectiveness and sustainability of Measurement for Improvement training and curriculum.

Zuneera's research aims to conduct a case study to assess the effectiveness and sustainability of Measurement for Improvement curriculum and training intervention at micro, meso and macro levels in healthcare staff. It intends to answer questions including:

- Identifying the essential components of successful measurement for improvement training.
- Identifying characteristics and experiences of learners which aid in successful acquisition, retention and application of measurement knowledge.
- Investigate the organizational and contextual factors that impede or facilitate the uptake and spread of measurement for improvement training

This letter is directed towards staff who have participated in the measurement for improvement training interventions. The researcher requests your time and patience to participate in interviews to help explore this research question. The researcher wants to inform you that:

- Participation in the research is voluntary and anonymous.
- If you are interested in participating in the research, you will be contacted by the researcher to explain the study and answer questions (if any).
- You will be provided with information sheets and consent forms before interviews.
- The interview will require approximately 40 minutes and the time and venue will be decided based on the convenience of the participant.
- The researcher intends to publish a research article based on the evaluation, but it will not disclose names or identities of participants.
- You may decline to answer any question, and you may withdraw from the interview at any time

Your participation will help the researcher to develop recommendations for the revision of the curriculum that will make it better suited to the needs of Irish Healthcare staff.

Thank you very much for your time,

The National Quality Improvement Team



**Supplemental File 3: Consent forms**

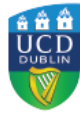

UCD School of Nursing, Midwifery and Health Systems  
UCD College of Health and Agricultural Sciences

**PARTICIPANT CONSENT FORM**

**Project:** Evaluating the impact of Measurement for Improvement training

**Participant Number:**

**Principal Investigator:** Prof Eilish McAuliffe<sup>1</sup>

**Researchers:** Ms. Zuneera Khurshid<sup>1</sup>, Dr Aoife De Brun<sup>1</sup>, Dr. Jennifer Martin<sup>2</sup>, Dr. Philip Crowley<sup>2</sup>

**Please tick each**

|                                                                                                                                                                                                                                                                                                                                                             |                          |
|-------------------------------------------------------------------------------------------------------------------------------------------------------------------------------------------------------------------------------------------------------------------------------------------------------------------------------------------------------------|--------------------------|
| I have read the information sheet and understand that I will be involved in this research to explore the impact of measurement for improvement training on work practices.                                                                                                                                                                                  | <input type="checkbox"/> |
| I understand that my participation in this study is voluntary and that I am free to withdraw my participation at any time without giving a reason.                                                                                                                                                                                                          | <input type="checkbox"/> |
| I understand that I will be taking part in a 40-minute one-on-one interview with a member of the research team, but that this is voluntary, and I can decline to take part if I wish. If I choose to take part, I know I can withdraw at any point up to or during the interview and can receive a copy of my transcript for my review after the interview. | <input type="checkbox"/> |
| I understand that all data collected during the study will remain confidential, and I consent to my responses and personal information being stored in a locked filing cabinet and on password protected and encrypted computers located in the School of Nursing, Midwifery and Health Systems, University College Dublin.                                 | <input type="checkbox"/> |
| I understand that if any disclosures are made that would indicate malpractice or misconduct at any point during the study or suggest that any individual was in danger of harm, this information will be disclosed to the appropriate personnel and the researcher would be obliged to report this to the unit manager at the earliest opportunity.         | <input type="checkbox"/> |
| My queries have been addressed to my satisfaction by the research team and I consent to take part in this study.                                                                                                                                                                                                                                            | <input type="checkbox"/> |

\_\_\_\_\_  
Name of participant

\_\_\_\_\_  
Date

\_\_\_\_\_  
Signature

\_\_\_\_\_  
Name of person taking consent

\_\_\_\_\_  
Date

\_\_\_\_\_  
Signature

- |                                                                                                                                                              |
|--------------------------------------------------------------------------------------------------------------------------------------------------------------|
| <p>1. School of Nursing, Midwifery &amp; Health Systems, University College Dublin</p> <p>2. National Quality Improvement Team, Health Service Executive</p> |
|--------------------------------------------------------------------------------------------------------------------------------------------------------------|

## Standards for Reporting Qualitative Research (SRQR)\*

<http://www.equator-network.org/reporting-guidelines/srqr/>

| Title and abstract                                                                                                                                                                                                                                                                                                                                                                                          | Page/line no(s).<br>(Marked copy) |
|-------------------------------------------------------------------------------------------------------------------------------------------------------------------------------------------------------------------------------------------------------------------------------------------------------------------------------------------------------------------------------------------------------------|-----------------------------------|
| <p><b>Title</b> - Concise description of the nature and topic of the study Identifying the study as qualitative or indicating the approach (e.g., ethnography, grounded theory) or data collection methods (e.g., interview, focus group) is recommended</p>                                                                                                                                                | Page 1                            |
| <p><b>Abstract</b> - Summary of key elements of the study using the abstract format of the intended publication; typically includes background, purpose, methods, results, and conclusions</p>                                                                                                                                                                                                              | Page 3                            |
| <b>Introduction</b>                                                                                                                                                                                                                                                                                                                                                                                         |                                   |
| <p><b>Problem formulation</b> - Description and significance of the problem/phenomenon studied; review of relevant theory and empirical work; problem statement</p>                                                                                                                                                                                                                                         | Pages 4-6                         |
| <p><b>Purpose or research question</b> - Purpose of the study and specific objectives or questions</p>                                                                                                                                                                                                                                                                                                      | Page 6                            |
| <b>Methods</b>                                                                                                                                                                                                                                                                                                                                                                                              |                                   |
| <p><b>Qualitative approach and research paradigm</b> - Qualitative approach (e.g., ethnography, grounded theory, case study, phenomenology, narrative research) and guiding theory if appropriate; identifying the research paradigm (e.g., postpositivist, constructivist/ interpretivist) is also recommended; rationale**</p>                                                                            | Page 6-8                          |
| <p><b>Researcher characteristics and reflexivity</b> - Researchers' characteristics that may influence the research, including personal attributes, qualifications/experience, relationship with participants, assumptions, and/or presuppositions; potential or actual interaction between researchers' characteristics and the research questions, approach, methods, results, and/or transferability</p> | Page 15                           |
| <p><b>Context</b> - Setting/site and salient contextual factors; rationale**</p>                                                                                                                                                                                                                                                                                                                            | Page 5-6<br>Page 8-11             |
| <p><b>Sampling strategy</b> - How and why research participants, documents, or events were selected; criteria for deciding when no further sampling was necessary (e.g., sampling saturation); rationale**</p>                                                                                                                                                                                              | Page 15-16                        |
| <p><b>Ethical issues pertaining to human subjects</b> - Documentation of approval by an appropriate ethics review board and participant consent, or explanation for lack thereof; other confidentiality and data security issues</p>                                                                                                                                                                        | Page 17, Page 19                  |
| <p><b>Data collection methods</b> - Types of data collected; details of data collection procedures including (as appropriate) start and stop dates of data collection and analysis, iterative process, triangulation of sources/methods, and modification of procedures in response to evolving study findings; rationale**</p>                                                                             | Page 15-16                        |

|                       |                                                                                                                                                                                                                                                       |                                                 |
|-----------------------|-------------------------------------------------------------------------------------------------------------------------------------------------------------------------------------------------------------------------------------------------------|-------------------------------------------------|
| 1<br>2<br>3<br>4<br>5 | <b>Data collection instruments and technologies</b> - Description of instruments (e.g., interview guides, questionnaires) and devices (e.g., audio recorders) used for data collection; if/how the instrument(s) changed over the course of the study | Page 15-16,<br>Supplemental Files<br>1, 2 and 3 |
| 6<br>7<br>8           | <b>Units of study</b> - Number and relevant characteristics of participants, documents, or events included in the study; level of participation (could be reported in results)                                                                        | Page 16                                         |
| 9<br>10<br>11<br>12   | <b>Data processing</b> - Methods for processing data prior to and during analysis, including transcription, data entry, data management and security, verification of data integrity, data coding, and anonymization/de-identification of excerpts    | Page 17                                         |
| 13<br>14<br>15<br>16  | <b>Data analysis</b> - Process by which inferences, themes, etc., were identified and developed, including the researchers involved in data analysis; usually references a specific paradigm or approach; rationale**                                 | Page 17                                         |
| 17<br>18<br>19<br>20  | <b>Techniques to enhance trustworthiness</b> - Techniques to enhance trustworthiness and credibility of data analysis (e.g., member checking, audit trail, triangulation); rationale**                                                                | Page 17                                         |

## Results/findings

|                      |                                                                                                                                                                                                   |    |
|----------------------|---------------------------------------------------------------------------------------------------------------------------------------------------------------------------------------------------|----|
| 23<br>24<br>25<br>26 | <b>Synthesis and interpretation</b> - Main findings (e.g., interpretations, inferences, and themes); might include development of a theory or model, or integration with prior research or theory | NA |
| 27<br>28<br>29       | <b>Links to empirical data</b> - Evidence (e.g., quotes, field notes, text excerpts, photographs) to substantiate analytic findings                                                               | NA |

## Discussion

|                                  |                                                                                                                                                                                                                                                                                                                                                                                                             |            |
|----------------------------------|-------------------------------------------------------------------------------------------------------------------------------------------------------------------------------------------------------------------------------------------------------------------------------------------------------------------------------------------------------------------------------------------------------------|------------|
| 32<br>33<br>34<br>35<br>36<br>37 | <b>Integration with prior work, implications, transferability, and contribution(s) to the field</b> - Short summary of main findings; explanation of how findings and conclusions connect to, support, elaborate on, or challenge conclusions of earlier scholarship; discussion of scope of application/generalizability; identification of unique contribution(s) to scholarship in a discipline or field | Page 18-19 |
| 38<br>39                         | <b>Limitations</b> - Trustworthiness and limitations of findings                                                                                                                                                                                                                                                                                                                                            | Page 4     |

## Other

|                |                                                                                                                                               |         |
|----------------|-----------------------------------------------------------------------------------------------------------------------------------------------|---------|
| 42<br>43<br>44 | <b>Conflicts of interest</b> - Potential sources of influence or perceived influence on study conduct and conclusions; how these were managed | Page 19 |
| 45<br>46       | <b>Funding</b> - Sources of funding and other support; role of funders in data collection, interpretation, and reporting                      | Page 19 |

\*The authors created the SRQR by searching the literature to identify guidelines, reporting standards, and critical appraisal criteria for qualitative research; reviewing the reference lists of retrieved sources; and contacting experts to gain feedback. The SRQR aims to improve the transparency of all aspects of qualitative research by providing clear standards for reporting qualitative research.

1  
2  
3  
4  
5  
6  
7  
8  
9  
10  
11  
12  
13  
14  
15  
16  
17  
18  
19  
20  
21  
22  
23  
24  
25  
26  
27  
28  
29  
30  
31  
32  
33  
34  
35  
36  
37  
38  
39  
40  
41  
42  
43  
44  
45  
46  
47  
48  
49  
50  
51  
52  
53  
54  
55  
56  
57  
58  
59  
60

\*\*The rationale should briefly discuss the justification for choosing that theory, approach, method, or technique rather than other options available, the assumptions and limitations implicit in those choices, and how those choices influence study conclusions and transferability. As appropriate, the rationale for several items might be discussed together.

**Reference:**

O'Brien BC, Harris IB, Beckman TJ, Reed DA, Cook DA. **Standards for reporting qualitative research: a synthesis of recommendations.** *Academic Medicine*, Vol. 89, No. 9 / Sept 2014  
DOI: 10.1097/ACM.0000000000000388

For peer review only
