# Supplementary material for: Protocol for an integrated evaluation framework to study training, curricular and contextual factors impacting the success of a measurement for improvement training programme for healthcare staff in Ireland
Source: PubMed Central journal article supplement — BMJ Open. 2022 Feb 11;12(2):e047639. doi: 10.1136/bmjopen-2020-047639 (PMC8845174; doi:10.1136/bmjopen-2020-047639), 2022-02-11
Supplement: bmjopen-2020-047639supp002.pdf [file bmjopen-2020-047639supp002.pdf]

**Supplemental File 2: Recruitment letter**

Dear Colleague,

This letter is to introduce Zuneera Khurshid, a PhD student enrolled at University College Dublin (UCD) supervised by Professor Eilish McAuliffe, engaged by the National Quality Improvement Team (NQIT) to conduct research on the effectiveness and sustainability of Measurement for Improvement training and curriculum.

Zuneera's research aims to conduct a case study to assess the effectiveness and sustainability of Measurement for Improvement curriculum and training intervention at micro, meso and macro levels in healthcare staff. It intends to answer questions including:

- Identifying the essential components of successful measurement for improvement training.
- Identifying characteristics and experiences of learners which aid in successful acquisition, retention and application of measurement knowledge.
- Investigate the organizational and contextual factors that impede or facilitate the uptake and spread of measurement for improvement training

This letter is directed towards staff who have participated in the measurement for improvement training interventions. The researcher requests your time and patience to participate in interviews to help explore this research question. The researcher wants to inform you that:

- Participation in the research is voluntary and anonymous.
- If you are interested in participating in the research, you will be contacted by the researcher to explain the study and answer questions (if any).
- You will be provided with information sheets and consent forms before interviews.
- The interview will require approximately 40 minutes and the time and venue will be decided based on the convenience of the participant.
- The researcher intends to publish a research article based on the evaluation, but it will not disclose names or identities of participants.
- You may decline to answer any question, and you may withdraw from the interview at any time

Your participation will help the researcher to develop recommendations for the revision of the curriculum that will make it better suited to the needs of Irish Healthcare staff.

Thank you very much for your time,

The National Quality Improvement Team
