# Supplementary material for: Protocol for an integrated evaluation framework to study training, curricular and contextual factors impacting the success of a measurement for improvement training programme for healthcare staff in Ireland
Source: PubMed Central journal article supplement — BMJ Open. 2022 Feb 11;12(2):e047639. doi: 10.1136/bmjopen-2020-047639 (PMC8845174; doi:10.1136/bmjopen-2020-047639), 2022-02-11
Supplement: bmjopen-2020-047639supp003.pdf [file bmjopen-2020-047639supp003.pdf]

**Supplemental File 3: Consent forms**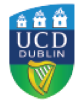

UCD School of Nursing, Midwifery and Health Systems  
UCD College of Health and Agricultural Sciences

**PARTICIPANT CONSENT FORM**

**Project:** Evaluating the impact of Measurement for Improvement training

**Participant Number:**

**Principal Investigator:** Prof Eilish McAuliffe<sup>1</sup>

**Researchers:** Ms. Zuneera Khurshid<sup>1</sup>, Dr Aoife De Brun<sup>1</sup>, Dr. Jennifer Martin<sup>2</sup>, Dr. Philip Crowley<sup>2</sup>

**Please tick each**

|                                                                                                                                                                                                                                                                                                                                                             |                          |
|-------------------------------------------------------------------------------------------------------------------------------------------------------------------------------------------------------------------------------------------------------------------------------------------------------------------------------------------------------------|--------------------------|
| I have read the information sheet and understand that I will be involved in this research to explore the impact of measurement for improvement training on work practices.                                                                                                                                                                                  | <input type="checkbox"/> |
| I understand that my participation in this study is voluntary and that I am free to withdraw my participation at any time without giving a reason.                                                                                                                                                                                                          | <input type="checkbox"/> |
| I understand that I will be taking part in a 40-minute one-on-one interview with a member of the research team, but that this is voluntary, and I can decline to take part if I wish. If I choose to take part, I know I can withdraw at any point up to or during the interview and can receive a copy of my transcript for my review after the interview. | <input type="checkbox"/> |
| I understand that all data collected during the study will remain confidential, and I consent to my responses and personal information being stored in a locked filing cabinet and on password protected and encrypted computers located in the School of Nursing, Midwifery and Health Systems, University College Dublin.                                 | <input type="checkbox"/> |
| I understand that if any disclosures are made that would indicate malpractice or misconduct at any point during the study or suggest that any individual was in danger of harm, this information will be disclosed to the appropriate personnel and the researcher would be obliged to report this to the unit manager at the earliest opportunity.         | <input type="checkbox"/> |
| My queries have been addressed to my satisfaction by the research team and I consent to take part in this study.                                                                                                                                                                                                                                            | <input type="checkbox"/> |

\_\_\_\_\_  
Name of participant

\_\_\_\_\_  
Date

\_\_\_\_\_  
Signature

\_\_\_\_\_  
Name of person taking consent

\_\_\_\_\_  
Date

\_\_\_\_\_  
Signature

- |                                                                                                                                                              |
|--------------------------------------------------------------------------------------------------------------------------------------------------------------|
| <p>1. School of Nursing, Midwifery &amp; Health Systems, University College Dublin</p> <p>2. National Quality Improvement Team, Health Service Executive</p> |
|--------------------------------------------------------------------------------------------------------------------------------------------------------------|
